# Supplementary material
Source: PubMed Central journal article supplement (PMC11107994)

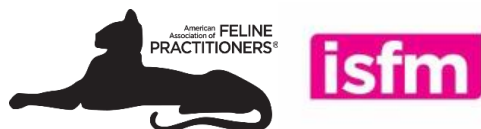

## ***AAFP (American Association of Feline Practitioners) e ISFM (International Society of Feline Medicine) –***

### ***Diretrizes para o manuseio amigável aos felinos***

#### **Autores:**

**Ilona Rodan** DVM DABVP (felino), Co-Presidente das Diretrizes

**Eliza Sundahl** DVM DABVP (felino), Co-Presidente das Diretrizes

**Hazel Carney** DVM MS DAVBP (felino canino)

**Anne-Claire Gagnon** DVM

**Sarah Heath** BVSc DipECVBM-CA CCAB, MRCVS

**Gary Landsberg** DVM MRCVS DACVB DECVBM-CA

**Kersti Seksel** BVSc (Hons) MRCVS FACVSc, DACVB DECVBM-CA

**Sophia Yin** DVM MS

O AAFP e o ISFM recebem com satisfação o endosso dessas diretrizes pela American Animal Hospital Association (AAHA).

**Cenário:** O número de gatos como animais de estimação está aumentando na maioria dos países, em alguns deles, já supera o número cães. Apesar disso, os gatos recebem menos cuidados veterinários do que os cães.<sup>1</sup> Os tutores declaram algumas dificuldades como os motivos para o menor número de visitas ao médico-veterinário, como colocar o gato em uma caixa de transporte, dirigir até a clínica e lidar com o gato assustado na clínica veterinária.<sup>2</sup> É necessário educar e preparar o tutor e a equipe veterinária em relação ao manuseio respeitoso dos felinos, a fim de evitar o estresse e atingir o objetivo de um bom cuidado para a saúde. Sem essa preparação, o estresse felino pode se transformar em medo ou agressão associada ao medo. O estresse pode alterar os resultados do exame físico e dos exames laboratoriais, levando a diagnósticos incorretos (por exemplo, diabetes mellitus) e tratamentos desnecessários.<sup>3-5</sup> Sem o manuseio compassivo e respeitoso da equipe veterinária, os tutores podem sentir que a equipe precisa de mais habilidades e compaixão ou que não entende os gatos. Podem ocorrer lesões no gato, no tutor e / ou na equipe veterinária.<sup>6</sup> Os tutores que desejam evitar o estresse do gato podem evitar visitas ao médico-veterinário ou escolher outra prática.

**Objetivos:** O uso de técnicas de manuseio *cat friendly* deve reduzir esses problemas. Estas técnicas dão mais resultado quando a equipe veterinária adapta a abordagem para cada gato e situação individuais. O objetivo dessas diretrizes é fornecer informações úteis para o manuseio dos gatos com o objetivo de:

- ❖ Reduzir medo e dor dos felinos.
- ❖ Construir e reforçar laços de confiança entre médico-veterinário-tutor-felino, portanto, melhor assistência médica ao longo da vida do gato.

- ❖ Maior eficiência, produtividade e satisfação no trabalho para a equipe veterinária.
- ❖ Maior compreensão do tutor.
- ❖ Relatórios oportunos e detecção precoce de preocupações médicas e comportamentais.
- ❖ Menos lesões nos clientes e na equipe veterinária.
- ❖ Reduzir a ansiedade do tutor.

## Comportamento social e comunicação

As pessoas geralmente interpretam mal o comportamento dos felinos e como eles lidam com o estresse e conflitos. As equipes veterinárias podem ajudar os tutores a criar expectativas realistas sobre o comportamento dos felinos e sobre como resolver problemas. Comece educando a equipe e os tutores sobre as características sociais e comportamentais únicas dos gatos. Ajude-os a aprender a interpretar comportamentos pela perspectiva do animal - ou seja, "pensar como um gato".

### Conceitos do comportamento felino

Historicamente, as pessoas tinham gatos por sua capacidade de caçar e matar roedores e não por outras características, de modo que os comportamentos inatos dos gatos não mudaram significativamente por seleção genética.<sup>7,8</sup> Gatos precisam expressar o comportamento de caça, que também é um componente das suas brincadeiras. Pode ser possível distraí-los na clínica usando um brinquedo interativo, como um ratinho de brinquedo preso em um fio.

Gatos são caçadores solitários - evitam brigas com outros indivíduos sempre que possível e conseguem isso se distanciando de outros gatos.<sup>9</sup> Quando confrontados, frequentemente respondem evitando ou se escondendo, sendo que a luta ocorre apenas como último recurso. Permitir que os gatos se sintam escondidos enquanto estão na clínica veterinária, usando itens como toalhas ou caixas de transporte, pode facilitar o manuseio.

A ousadia, a aceitação da novidade e da interação variam de acordo com a predisposição genética e o ambiente de cada gato. A socialização e a habituação ao manuseio humano, a partir de 2 a 7 semanas de idade, melhoram as relações entre felinos e humanos.<sup>10</sup> No entanto, pessoas agitadas, manuseio inadequado, movimentos bruscos ou irregulares ou vozes altas podem causar uma reação inesperada ou repentina de medo ou agressividade nos gatos.

Gatos são animais sociais, interagindo primariamente com indivíduos da mesma colônia. Eles não têm uma capacidade inata de tolerar gatos estranhos em uma introdução inicial<sup>11-13</sup>. Como animais predadores e presas, os gatos geralmente demonstram medo ou defensividade em ambientes desconhecidos ou com pessoas desconhecidas.<sup>11,14</sup> Esse comportamento pode ser disfarçado (não óbvio) ou evidente (facilmente visto).

Os gatos reservam a comunicação tátil com outros gatos para os membros de seu grupo social ou colônia. Gatos mostram afiliação e mantêm o odor da colônia através do *allorubbing* (esfregando-se um contra o outro; geralmente mal interpretada quando é direcionada aos seres humanos como um pedido de alimento ou afeto) e através do *allogrooming* (lambendo um ao outro, geralmente na cabeça e no pescoço).<sup>15,16</sup>

A maioria dos gatos prefere o toque físico na cabeça e no pescoço. Os gatos podem ficar irritados e até agressivos quando as pessoas tentam acariciá-los em outras áreas (por exemplo, aumento da agitação e contrair a pele quando as costas são tocadas; agarrar mãos e braços dos humanos com suas garras quando tocados no abdômen depois de rolar de costas).<sup>11,17,18</sup>

### Reconhecendo a ansiedade e o medo

O medo é uma resposta que permite evitar o perigo percebido.<sup>9</sup> A ansiedade resulta da antecipação de um evento adverso com base em uma experiência anteriormente negativa, como medo ou experiência dolorosa.<sup>19</sup>

### Primeiros sinais de medo e ansiedade

A maior parte dos membros da equipe veterinária pode reconhecer sinais faciais e posturais que indiquem um comportamento agressivo associado ao medo. As diferentes expressões mostradas aqui demonstram pontos em que a equipe veterinária pode tentar amenizar comportamentos crescentes de medo ou agressividade associada ao medo, muito antes de um gato ficar totalmente agitado.

#### Posturas Corporais

Este gato mostra sinais crescentes de medo quando um técnico se aproxima. O gato exibiu a sequência de comportamentos abaixo em menos de um minuto. O medo foi neutralizado através da distração.

O técnico está a cerca de 2 metros de distância. O gato está demonstrando sinais iniciais de medo ou ansiedade, girando levemente as orelhas e abaixando-as horizontalmente. As costas estão começando a se arquear. Observe a leve tensão na face. A equipe deve agir neste momento para neutralizar o medo deste gato.

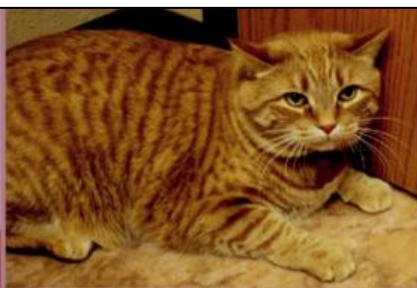

O gato mostra um aumento do medo, aproximando os pés do corpo, abaixando a cabeça e fazendo-se parecer menor.

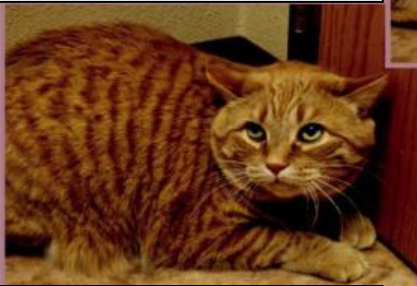

O gato agora está se preparando para a luta. As costas ficaram mais arqueadas e as orelhas mais achatadas, sugerindo que ele é potencialmente mais agressivo. (Alguns segundos depois, o gato sibilou (fuzz) e deu a entender que avançaria)

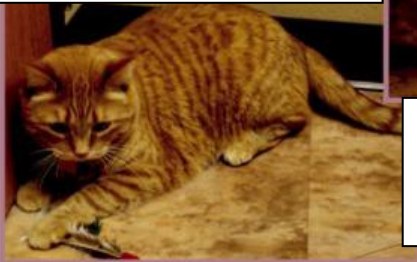

O técnico mudou a abordagem e começou a atrair a atenção do gato para o seu brinquedo favorito. Observe a pata estendida e as orelhas para cima. As costas não estão mais arqueadas e a postura geral está mais relaxada

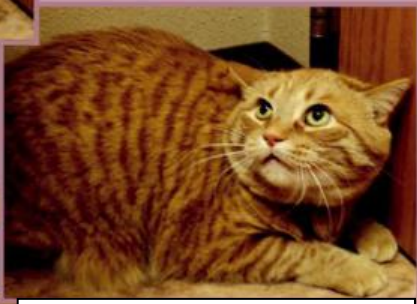

#### Expressões faciais

Essas imagens aproximadas mostram a face do gato à medida que se torna mais assustado. Quando esses sinais aparecerem, tome medidas para diminuir a ansiedade dos gatos.

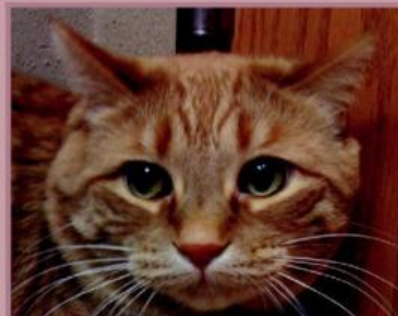

Midríase progressiva e rotação / achatamento leve das orelhas indicam medo crescente

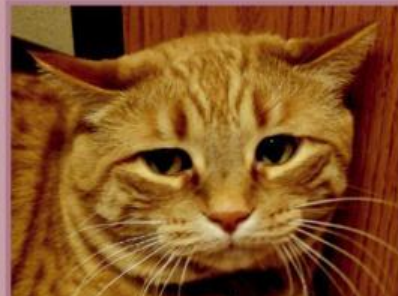

Pupilas ligeiramente estreitas ou alongadas, orelhas giradas horizontalmente e para a frente e mandíbula mais tensa mostram apreensão e medo crescente.

Com a experiência, podemos aprender a reconhecer sinais sutis e precoces de medo ou ansiedade e suas respostas comportamentais agressivas relacionadas.<sup>20</sup> O reconhecimento precoce destes sinais permite que medidas sejam tomadas para impedir a expansão de uma resposta completa do medo à agressão. A

posição da orelha, a postura corporal e o movimento da cauda são indicadores que ajudam a identificar o estado de espírito de um gato.<sup>9,21</sup> Mudanças nos olhos e na face também dão pistas para mensurar a ansiedade. Gatos ansiosos ou com medo podem produzir aumento da sudorese nas patas. A ansiedade e o medo também podem ser reconhecidos por mudanças na vocalização - de miados de ansiedade a rosnar, sibilar (fuzz) e cuspir.

Os gatos não têm técnicas para resolver conflitos acalmando um ao outro e, em vez disso, congelam, fogem, lutam ou se envolvem em comportamentos de deslocamento (por exemplo, autolimpeza). Aquiescência, silêncio e / ou falta de movimento não sinalizam falta de dor ou ansiedade. Um gato que "congela" está sinalizando que está ansioso ou desconfortável.<sup>22</sup>

## **Preparando o tutor e o gato para a visita ao veterinário**

Dedicar tempo para acostumar o filhote ou gato adulto a sair de casa e ser manuseado pode reduzir o estresse das visitas veterinárias ao longo da vida. A equipe veterinária e o tutor podem trabalhar juntos para desenvolver estratégias a fim de preparar os gatos para experiências veterinárias positivas. Sempre que possível, a equipe e / ou tutor, conforme apropriado, devem:

- ❖ **Ensaiair visitas ao hospital ou clínica veterinária** com recompensas positivas (por exemplo, alimentos atrativos) para apresentar o felino à esta prática e estar perto de outras pessoas e outros gatos. Recompense e reforce todo o comportamento desejado, usando técnicos ou enfermeiros veterinários\*. Evite punir os gatos, física ou verbalmente, pois isso pode ter efeitos indesejados, como aumento ou redirecionamento da agressão.<sup>23</sup>

\* Nota: Enfermeira é uma designação europeia

- ❖ **Oferecer aulas ao tutor** - aulas para tutores de gatos filhotes. Isso permite oportunidades de educa-los sobre o manuseio positivo dos gatinhos, ajudando a familiarizá-los com diferentes pessoas e uma variedade de situações positivas.
- ❖ **Ensaiair exames clínicos** e aprender a fazer procedimentos em casa usando elogios calmos e recompensar esses procedimentos com reforço positivo, através de alimentos ou outras recompensas (por exemplo, brincadeira, catnip, massagear o pescoço ou o queixo). Gentilmente execute estes procedimentos, conforme demonstrado por um membro da equipe veterinária:

- Manuseio das patas e olhar os ouvidos para se preparar para exames de ouvido e corte de unhas;
- Abrir a boca em associação com um alimento atrativo, para se preparar para exames orais, administração de medicamentos orais ou escovação de dentes;
- Tocar sobre as pernas e o corpo, para se preparar para o exame físico;
- Escovação;
- Realizar procedimentos médicos regulares em casa (por exemplo, administrar a vermifugação preventiva prescrita, fazer aferições de glicemia em pacientes diabéticos).

- ❖ **Adapte os gatos à caixas de transporte** (veja no quadro a seguir como adaptar os gatos à caixa de transporte). Leve gatos filhotes e adultos para pequenos passeios de carro eventualmente, começando desde jovens, se possível.
- ❖ **Localize o gato antes do horário de sair de casa** no dia da visita ao médico-veterinário para sair a tempo; incentive o gato a entrar sozinho na caixa de transporte (veja no quadro a seguir como adaptar os gatos à caixa de transporte).
- ❖ **Traga itens com odor familiar** para o gato, como cobertores ou brinquedos favoritos.
- ❖ **Avisar a equipe veterinária com antecedência** caso o gato possa ser facilmente irritado. Isso permitirá que eles se preparem (por exemplo, transfira o gato para o consultório imediatamente, tenha alimentos e brinquedos disponíveis para distraí-lo). A equipe veterinária pode oferecer flexibilidade e escolha, adaptando a consulta para cada tutor e seu gato individualmente, conforme apropriado. Por exemplo, alguns gatos se saem melhor com visitas domiciliares, outros não.
- ❖ **Entenda o efeito de sua própria ansiedade ou estresse** no gato, mantenha a calma e reduza qualquer demonstração externa de medo e ansiedade.
- ❖ **Permaneça positivo**, prossiga no ritmo do gato, fique atento às suas respostas e use recompensas que incentivem os comportamentos desejados (petiscos, alimentos, brinquedos, carinho).
- ❖ **Se indicado, use ansiolíticos e / ou medicamentos** contra náusea prescritos para o gato.
- ❖ **Planeje o retorno do gato para casa** (Veja "Voltando para casa").

Consulte a Tabela 1 (Sites e informações úteis on-line para tutores ou equipes veterinárias) e a lista de leituras complementares (Leitura adicional para equipes veterinárias ou tutores) para obter informações úteis.

. . . Permitir que os gatos se sintam escondidos enquanto estão na clínica veterinária pode facilitar o manuseio.

## Caixas de transporte

As caixas de transporte fornecem segurança para o tutor e para o felino durante o transporte,<sup>24</sup> e geralmente dão ao gato uma sensação de segurança por estarem escondidos em um local fechado e seguro. Pesquisas estão em andamento para determinar as melhores características das caixas de transporte. Elas devem ser resistentes, seguras e estáveis para o gato, fáceis de serem transportadas pelo tutor e silenciosas para que a abertura não assuste o gato. Alguns gatos gostam de ver, enquanto outros ficam menos ansiosos quando cobertos. O design deve permitir a fácil retirada do gato, caso ele não queira sair por conta própria, ou deve permitir que o gato seja facilmente examinado na parte inferior da caixa de transporte. Uma parte superior removível é útil para gatos com medo ou que se tornam agressivos quando estão com medo, bem como para gatos doentes, com dores ou mobilidade limitada.

As caixas de transporte fornecem segurança tanto para o tutor quanto para o gato durante o transporte, e geralmente dão ao gato uma sensação de segurança.

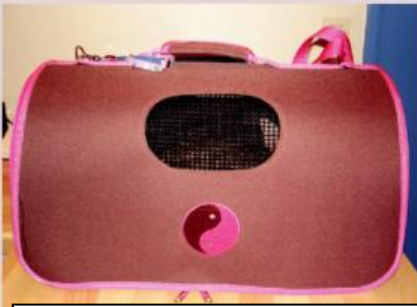

Existe uma variedade de estilos de caixas de transporte, como este que se fecha, permitindo que o gato seja exposto lentamente, conforme apropriado, enquanto permanece em sua própria cama. *Cortesia Dra. Anne-Claire Gagnon*

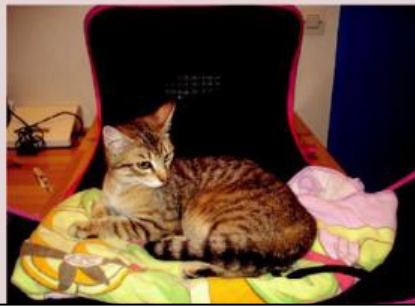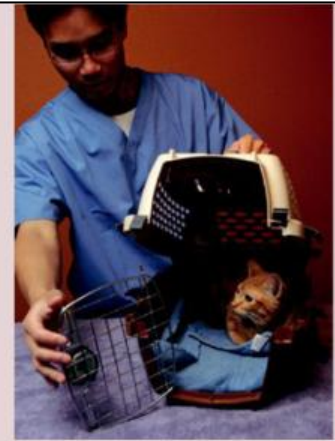

Uma caixa de transporte convencional, com parte superior e frontal removíveis. *Cortesia Dr Sophia Yin*

### Treinando o gato para usar a caixa de transporte

O objetivo é que o gato aprenda a associar a caixa com experiências positivas e a entrar voluntariamente. Faça da caixa de transporte uma parte familiar dos móveis em casa, com cobertores macios para maior conforto. Se o gato responder positivamente a alimentos, catnip e / ou brinquedos, coloque-os na caixa aberta como reforço positivo para incentivá-lo a entrar na caixa em casa. Alguns tutores podem achar útil treinar o gato para entrar na caixa usando uma palavra ou clicker como sinal. Cada indivíduo responde diferentemente a alimentos; use-os se isso fizer o gato ficar menos estressado ou ansioso.

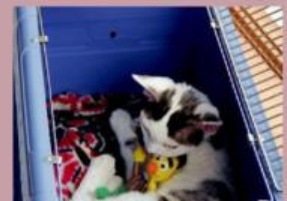

Gatinho relaxado, com seu brinquedo favorito! *Cortesia da Dra. Ilona Rodan*

### Colocando um gato relutante na caixa de transporte

Se o gato não estiver acostumado a caixa quando uma visita veterinária for iminente, planeje uma estratégia que funcione com o tipo de caixa e o ambiente doméstico. Colocar a caixa de transporte em uma pequena sala com poucos esconderijos pode incentivar o gato a escolher a caixa de transporte. Considere o uso de um spray de feromônio facial felino sintético na caixa pelo menos 30 minutos antes do transporte para ajudar a acalmar o gato. Abra a caixa e coloque dentro uma cama familiar, um brinquedo e / ou um alimento. Incentive o gato a entrar voluntariamente. Não persiga o gato para colocá-lo na caixa. Se necessário, remova a parte superior enquanto incentiva o gato a entrar na parte inferior e, em seguida, recoloca a parte superior com calma.

### Acomodando a caixa de transporte no carro

Antes de qualquer visita veterinária programada, pratique carregar a caixa, colocá-la e tirá-la de dentro do carro. Tente primeiro sem o gato, para ter certeza de que não há muito balanço ou batidas na caixa e depois tente com o gato dentro. Durante o caminho, prenda a caixa colocando-a no chão do carro ou usando o cinto de segurança, porque a caixa solta em movimento pode assustar o gato. Colocar uma toalha sobre ela pode impedir a agitação visual.

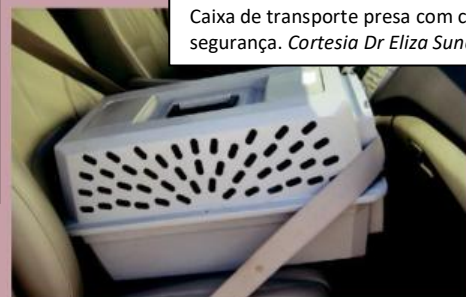

Caixa de transporte presa com cinto de segurança. *Cortesia Dr Eliza Sundahl*

## Princípios gerais para criar um ambiente positivo

- **Gerenciar odores**

Gerencie odores limpando superfícies, lavando as mãos e removendo os pelos após o atendimento de cada paciente. Ventile o ambiente após todos os incidentes olfativos (por exemplo, descartar o lixo após expressão da glândula anal, limpar onde outro gato caminhou ou se esfregou os móveis).<sup>25</sup> Os gatos são macrosmáticos, ou seja, seu sentido olfativo muito sensível leva a muitas de suas respostas comportamentais. Alguns odores (por exemplo, odorizadores de ambiente, desinfetantes, álcool, sangue, desodorante, perfume) e roupas desconhecidas podem causar ansiedade ou medo.<sup>26-28</sup>

- **Considere usar um análogo sintético de feromônio facial felino**

Estudos mostram que o análogo sintético do feromônio facial felino pode ter efeitos calmantes em ambientes estressantes, reduzindo a ansiedade, medo e agressão e aumentando a auto-higienização e a ingestão de alimentos em gatos em gaiolas hospitalares.<sup>29-32</sup> Os gatos podem se beneficiar dos difusores colocados em todos os ambientes da clínica e de um spray usado com cerca de 30 minutos de antecedência nos materiais utilizados onde os gatos vão se deitar, nas gaiolas hospitalares e nas toalhas usadas no manuseio.

Use o análogo sintético do feromônio facial felino como algo a mais e nunca como um substituto para a remoção de odores, lavagens, manuseio gentil e outras ações para criar um ambiente *cat friendly* para os gatos.

- **Gerenciar sinais visuais e auditivos**

Minimize os sinais visuais que podem levar à ansiedade. Mantenha outros pacientes afastados da linha de visão do gato. Quando possível, forneça uma entrada separada para os felinos e uma área ou sala de espera exclusiva para felinos. Cubra as caixas de transporte com um cobertor ou toalha. Minimize a iluminação muito forte.<sup>33,34</sup> Proporcione um ambiente silencioso e fale suavemente. Minimize ruídos que podem assustar os gatos, como telefones e ventiladores. Considere usar música de fundo suave e absorção sonora.

- **Se você tem um gato residente na clínica ...**

Esteja ciente de que pode provocar ansiedade em um paciente se for visto, cheirado ou ouvido. Treine a equipe para reconhecer quaisquer sinais de estresse, tanto no gato residente quanto nos pacientes, e esteja pronto para responder ou impedir o acesso do gato residente às áreas dos pacientes.

## Preparando o ambiente de atendimento

### Preparando a sala de atendimento

Algumas considerações importantes para criar um ambiente *cat friendly*, que se aplicam a toda a clínica, estão descritas nos tópicos acima.

### Sala de espera / área de recepção

Minimize os tempos de espera agendando as consultas e procedimentos. Se possível, modifique a programação para fornecer:

- ❖ Agendamento de gatos durante os períodos mais calmos do dia.

- ❖ Consultas de gatos e cães em momentos diferentes.
- ❖ Horários e / ou dias diferentes para admissão de cães e gatos para cirurgia.
- ❖ Direcione o tutor e seu gato para o consultório o mais rápido possível para evitar contato com outros animais e ruídos. Se isso não for possível, minimize a interação gato-gato ou cachorro-gato, se ambos estiverem na sala de espera, orientando os clientes com cães para se afastarem de pacientes felinos, fornecendo salas de espera separadas para cães e gatos ou usando biombo para criar áreas separadas para cães / gatos. Mantenha as caixas de transporte dos gatos fora do chão (crie prateleiras elevadas acima da altura do nariz dos cães ou use uma cadeira estável que não esteja voltada para outro animal). Tenha toalhas / cobertores disponíveis para cobrir as caixas de transporte, se necessário.

### Consultório

Se a clínica ou hospital atender outros pacientes além dos felinos, tente dedicar pelo menos um consultório apenas para os gatos. Seja flexível na sua escolha de onde o exame ocorre (por exemplo, mesa, balança, cadeira, sofá ou chão); faça o exame onde o gato estiver mais confortável (Figura 1). Para remover sinais de odor, como feromônios de alarme, use sabonetes desinfetantes ou sabões em pó que removem proteínas e gorduras (que fazem parte da composição dos feromônios). Disponibilize uma variedade de alimentos, brinquedos descartáveis ou que o paciente leve consigo e / ou toalhas tratadas com catnip para engajar o gato positivamente. A resposta ao catnip e plantas similares varia devido a diferenças genéticas.<sup>35,36</sup>

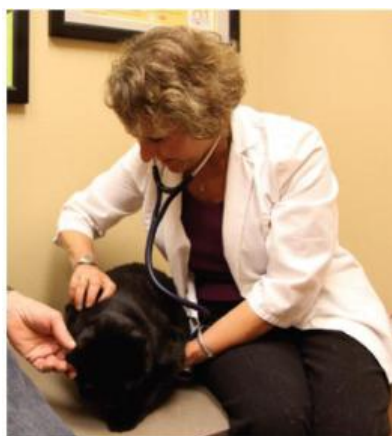

**FIGURA 1** Examine o gato onde é confortável para ele, como em um banco do consultório. *Cortesia da Dra. Ilona Rodan*

### Gaiolas hospitalares para gatos na clínica veterinária

Se possível, forneça salas apenas para gatos. A gaiola hospitalar ideal para gatos tem os seguintes atributos:

- ❖ É grande o suficiente para acomodar a caixa de transporte do próprio gato e para que a caixa de areia fique longe de comida, cobertores e água.
- ❖ Está em um nível médio ou superior. As gaiolas hospitalares lado a lado são preferíveis às gaiolas de frente para outras, para que os gatos não se vejam e fiquem visualmente agitados.<sup>37</sup>
- ❖ Oferece um refúgio seguro tanto para servir de esconderijo quanto para servir como local elevado (por exemplo, caixas de papelão resistentes). Se um gato mostrar menos ansiedade quando estiver em uma área mais escura, cubra a frente da gaiola hospitalar com uma toalha.
- ❖ Possui temperatura controlada e isolamento acústico. Observe que as gaiolas hospitalares de fibra de vidro são mais quentes, menos refletivas e mais silenciosas que as de aço inoxidável.

- ❖ Contém uma toalha e / ou brinquedos de casa.
- ❖ Contém o alimento e o granulado higiênico preferidos do gato. (Embora isso possa não ser possível para todos os pacientes, pode ajudar aqueles que estão ansiosos ou com medo. Considere pedir aos tutores que tragam o alimento do próprio gato.)

## Interagindo com o gato na clínica veterinária

### Preparando-se para receber o gato

O primeiro encontro com o gato afetará o sucesso da visita atual e das subsequentes. Sempre que possível, nomeie membros específicos da equipe '*cat friendly*'. Cumprimente gatos e clientes por seus nomes com linguagem corporal e voz moderadas.

Esteja ciente de quaisquer requisitos especiais de cada paciente antes que eles cheguem. Gatinhos brincalhões são facilmente distraídos por brinquedos ou alimentos. Gatos de meia idade e idosos frequentemente apresentam doenças articulares degenerativas e precisam de superfícies macias para mantê-los confortáveis; esteja ciente de que os níveis de dor de pacientes com condições crônicas variam.<sup>38</sup>

Na medida do possível, tenha os equipamentos necessários para exames e testes no consultório antes de manusear o gato. Para minimizar os efeitos negativos de gestos e ruídos, prepare todos os seus materiais (por exemplo, deixe as seringas fora de suas embalagens). Use máquinas de tosa ou tesouras silenciosas. Pense 'Vá devagar para avançar mais rápido'. Para a maioria dos gatos, usar uma abordagem lenta é mais eficiente para alcançar os resultados desejados. Adote um comportamento calmo e positivo e trabalhe em um ritmo consistente.

### Abrindo a caixa de transporte e acessando o gato

Abra a porta da caixa enquanto registra o histórico, para permitir que o gato escolha se quer se aventurar por conta própria. Alguns gatos podem sair mais rapidamente da caixa de transporte se ela estiver no chão. Se o gato estiver fora da caixa, feche-a e afaste-a durante o exame, mas permita que o gato retorne imediatamente a ela após a conclusão dos procedimentos. Gatos calmos que gostam da experiência podem explorar o consultório, se apropriado\*.

Se o gato ainda estiver na caixa quando você terminar o histórico, remova silenciosamente a tampa e a porta, se possível. A maioria dos gatos fica muito confortável em permanecer na parte inferior da caixa e permitirão que uma grande parte do exame seja feita enquanto estiverem ali.

Se o gato estiver com medo, coloque uma toalha entre as duas metades da caixa ao remover a parte superior; isso cobre o gato como uma "tenda", mas ele permanece acessível (Figura 2).

\* Nota de rodapé: Ao considerar se ou como permitir que os gatos se soltem no consultório e / ou se ou como permitir que os clientes mantenham seus gatos, siga as recomendações da sua associação veterinária, advogado e / ou companhia de seguros de responsabilidade.

Pense 'Vá devagar para avançar mais rápido'. Para a maioria dos gatos, usar uma abordagem lenta é mais eficiente para alcançar os resultados desejados.

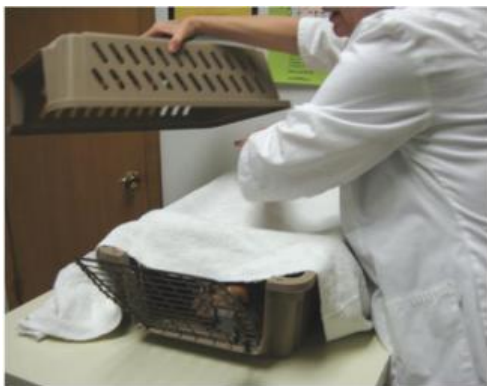

**FIGURA 2** Se o gato preferir ficar na sua caixa de transporte, o uso de uma toalha para cobri-lo quando a parte superior é removida pode diminuir sua ansiedade. Essa técnica também é o primeiro passo para colocar uma toalha sobre um gato que está exibindo agressão por medo. *Cortesia da Dra. Eliza Sundahl*

Algumas caixas de transporte não podem ser desmontadas. As opiniões variam sobre técnicas apropriadas para remover os gatos neste tipo de caixa, com pouca ou nenhuma evidência para mostrar quais são mais seguras e menos estressantes. Se o gato não sair por conta própria, mas aceitar o manuseio, tente as técnicas listadas abaixo.

Se o gato não sair da caixa de transporte. . .

- ❖ Faça o que puder para trabalhar com o gato dentro da caixa (Figura 3).
- ❖ Evite agarrar o gato para retirá-lo. Não incline a caixa para cima para sacudir o gato ou para ele cair. Evite o uso de bolsas, redes e luvas para gatos com gatos calmos.
- ❖ Alcance e apoie o abdômen caudal e as pernas traseiras para incentivar o gato a avançar.
- ❖ Se o gato agir com medo, deslize suavemente uma toalha ao redor dele para removê-lo.
- ❖ Se o gato mostrar resistência contínua e / ou sinais de medo, siga as dicas na seção sobre contenção química e como lidar com gatos com medo / agressivos. Evite aumentar o medo do gato.
- ❖ Discuta a escolha da caixa de transporte com o tutor

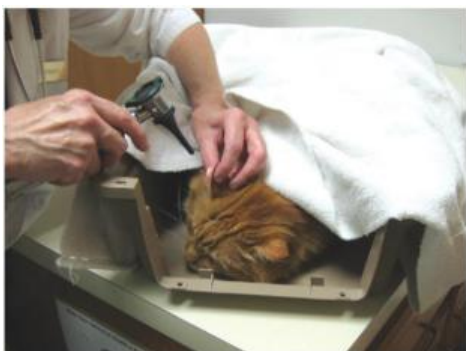

**FIGURA 3** Examinar um gato enquanto ele permanece no fundo da caixa de transporte pode ser menos estressante para ele. *Cortesia da Dra. Eliza Sundahl*

### Reconhecendo e respondendo aos sinais do gato

Confie na resposta do gato (linguagem corporal) para determinar seu próprio comportamento (Figura 4). Reconheça sinais precoces de agitação; se necessário, divida os procedimentos mais longos em etapas para evitar aumentar medo. Se o gato começar a mostrar medo, diminua a velocidade ou faça pausas no manuseio para evitar o aumento da agitação. Alguns gatos pioram com pausas e repetidas tentativas de manuseio, mesmo com pré-medicação; esses pacientes devem ser sedados ou anestesiados. Com o uso de medicamentos ansiolíticos que também podem ter um efeito amnésico (por exemplo, benzodiazepínicos), esses gatos podem melhorar ao longo de vários anos.

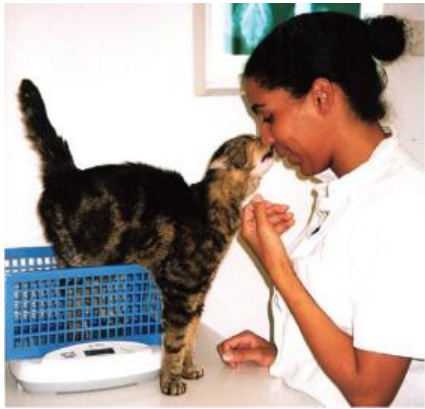

**FIGURA 4** Os gatos abaixam as orelhas por diferentes razões; este gato está relaxado e feliz. *Cortesia da Dra. Anne-Claire Gagnon*

Tente usar alimentos ou um analógico sintético de feromônio facial felino. Avalie o estresse potencial de vários procedimentos e ajuste o tempo se o gato ficar agitado. Determine sua estratégia antes e esteja pronto para mudar sua técnica para manejar uma situação de ansiedade que cresce rapidamente (consulte a discussão posterior sobre como lidar com gatos agressivos e com medo). Considere estas opções:

- ❖ Hospitalize o gato para realizar procedimentos adicionais mais tarde naquele dia.
- ❖ Use contenção química.
- ❖ Reagende para outro momento em que possa colocar em prática uma estratégia melhor (por exemplo, pré-medicação);

Sempre tente terminar a visita com uma nota positiva, com o tutor e seu gato os mais calmos possíveis.

### Realizando o exame e trabalhando com o gato

Aprenda uma variedade de técnicas e posições para cada procedimento e seja flexível com cada paciente individualmente. Tente as seguintes técnicas:

- ❖ Coloque toalhas ou almofadas antiderrapantes sob o gato ou mantenha-o em cima do cobertor que veio na caixa de transporte; o último é preferível porque o cheiro familiar pode tornar o gato mais seguro no ambiente hospitalar.
- ❖ Examine o gato no colo (de preferência o seu colo) com o gato de frente para o tutor e longe de você. Sempre coloque cobertores embaixo do gato e no seu colo. Use seu corpo e braço para apoiar o gato.
- ❖ Permita que o gato mantenha a posição escolhida por ele.
- ❖ Varie seu toque com a resposta do gato. A cabeça e o pescoço são as áreas de toque preferidas para o gato; colocar a mão na cabeça e massagear entre os olhos ou a cabeça entre as orelhas

pode acalmar o gato (Figura 5). Outros gatos permanecerão imóveis se você colocar a mão na frente do peito.

- ❖ Envolver o gato em uma toalha (Figura 6) ou cubra a cabeça dele com um cobertor, pois isso pode fazê-lo se sentir mais seguro.

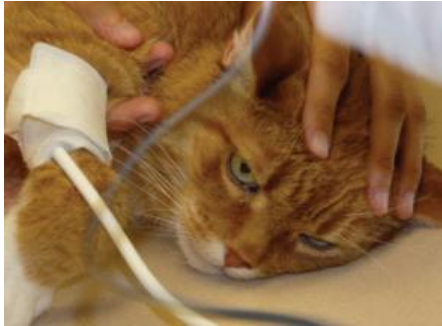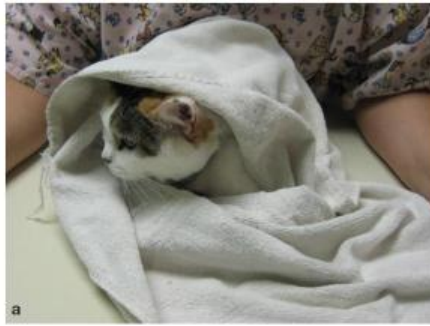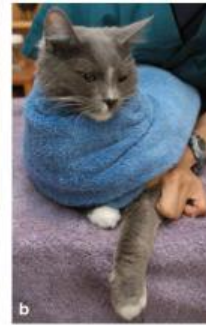

**FIGURA 5** Massagear ou acariciar a parte superior da cabeça pode ajudar a relaxar o gato enquanto realiza procedimentos como medir a pressão arterial. O primeiro e o quinto dedos ajudam a segurar cada lado da cabeça para evitar movimentos que possam causar ferimentos. *Cortesia da Dra. Ilona Rodan*

**FIGURA 6 (a)** Os gatos podem se sentir mais seguros enrolados em uma toalha enquanto estão na mesa para serem examinados, como no caso deste gato levemente ansioso. Ele está mais relaxado com essa técnica do que explorar o consultório ou permanecer em sua caixa de transporte. **(b)** Usar uma toalha para envolver o gato pode fornecer vários graus de restrição e controle. Esta técnica de toalha é excelente para punção venosa cefálica. *Cortesia da Dra. Eliza Sundahl (imagem a) e Dra. Sophia Yin (imagem b)*

- ❖ Sempre que possível, execute procedimentos no consultório.<sup>39</sup> A maioria dos tutores gosta de estar presente, mas se a ansiedade dele está piorando a situação do gato, peça educadamente que ele saia do consultório ao invés de mover o gato.

### **Tornando os comportamentos humanos menos ameaçadores para o gato**

- ❖ Evite o contato visual direto.
- ❖ Mova-se devagar e deliberadamente; minimize gestos com as mãos.
- ❖ Coloque-se no mesmo nível que o gato; aproxime-se pela lateral e não apareça por cima do gato.
- ❖ Use uma voz calma e baixa. Discussões animadas podem envolver o cliente, mas assustar o gato.
- ❖ Se o gato estiver ansioso, devolva-o à caixa de transporte antes de passar as instruções para o tutor, a menos que você precise demonstrar alguma técnica.
- ❖ Esteja ciente de suas próprias emoções e de seus efeitos potenciais no comportamento do gato.

### **Minimizar o estresse de procedimentos médicos**

- ❖ Se for executar vários procedimentos, comece com os menos estressantes ou invasivos.<sup>40</sup>
- ❖ Ofereça diferentes vias de administração de medicamentos, quando disponíveis. Mostre ao tutor como dar comprimidos. Considere opções para auxiliar nisso, como alimentos ou petiscos atrativos nos quais os comprimidos podem ser escondidos.<sup>41</sup>
- ❖ Considere aplicar injeções em temperatura ambiente, se isso não afetar a eficácia do produto.
- ❖ Use uma agulha para aspirar a vacina ou medicamento e uma agulha diferente, de menor calibre, para administrar injeções.<sup>42</sup>

- ❖ Manter a cabeça e o corpo em posições naturais pode permitir procedimentos como punção venosa jugular / cefálica e cistocentese (Figura 7) com mínimas restrições.
- ❖ Para gatos que reagem fortemente quando tocados com uma agulha e / ou quando várias injeções são necessárias, aplique um anestésico tópico ou use um opioide transmucoso.

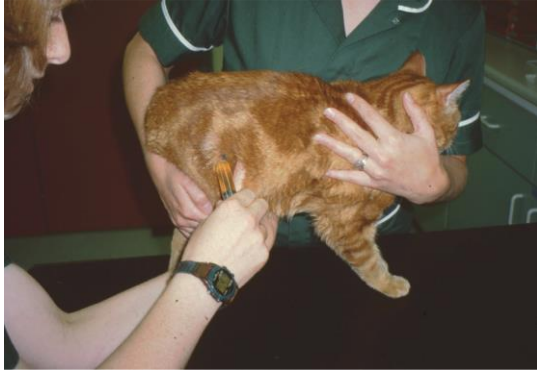

**FIGURA 7** Muitos procedimentos requerem restrição mínima se o gato estiver em uma posição natural, como nesta cistocentese em pé. *Cortesia do professor Daniëlle Gunn-Moore*

### **Sobre a técnica de 'scruffing' - segurar o gato através da pele dorsal do pescoço**

'Scruffing'\* é um termo geral para uma variedade de contenções na pele do pescoço do gato. Segurar a nuca varia de um aperto suave da pele a uma dobra maior da pele com quantidades variáveis de pressão. A consideração do comportamento natural dos felinos pode ajudar a colocar essa técnica em perspectiva. Gatos agarram a nuca de outros gatos apenas em circunstâncias limitadas.<sup>43,44</sup> Durante as primeiras semanas de vida, a mãe pode levantar gatinhos pela nuca usando a boca.<sup>45</sup> Este é um método de transporte e imobilização, e não uma forma de disciplina. Durante o acasalamento, o macho agarra a nuca da fêmea.<sup>46,47</sup>

Alguns médicos-veterinários e veterinários comportamentalistas não usam 'scruffing' e não toleram seu uso. Eles sabem que o uso de outras técnicas de manuseio suave são menos estressantes, mais eficientes em termos de tempo, proporciona maior segurança para a pessoa e permite que o gato tenha uma sensação de controle. Eles preferem outros métodos para gerenciar situações em que o bem-estar felino ou a segurança da pessoa estão em jogo.

Outros veterinários tratam os gatos com delicadeza e usam o 'scruffing' apenas se for necessário para preservar o bem-estar do gato ou para a proteção física da pessoa. Outros ainda pensam que o 'scruffing' é aceitável para procedimentos curtos, em caso de emergência e para impedir que o gato escape ou machuque alguém.

Se você acha que essa técnica é a *única* alternativa, avalie cuidadosamente o gato quanto a sinais de medo ou ansiedade. O gato pode ficar imóvel, mas pode não estar confortável ou pode se tornar agressivo. Manuseie o gato o mais gentilmente possível e o proteja contra o uso de técnicas de manuseio agressivas por raiva ou frustração. O consenso dos especialistas não tolera levantar o gato ou suspender seu peso corporal segurando-o pela pele dorsal do pescoço pois isto é desnecessário e potencialmente doloroso.

'Clipping' ou 'inibição comportamental induzida por pressão' é um termo que diz respeito ao uso de cliques para aplicar pressão na pele do pescoço dorsal ou em outras áreas ao longo da linha média dorsal.<sup>44</sup> Alguns veterinários e comportamentalistas não usam este procedimento e não toleram seu uso. Alguns têm reservas quanto ao procedimento e preocupam-se com a ética do controle do comportamento através da inibição de respostas comportamentais.

*\*Nota: Ao revisar essas diretrizes, o painel de especialistas em felinos da ISFM / FAB apoia firmemente a visão de que o "scruffing" (segurar o gato através da pele dorsal do pescoço) nunca deve ser usada como um método rotineiro de contenção e deve ser usada apenas quando não há alternativa.*

## Técnicas para trabalhar com gatos com medo ou agressivos

Os médicos-veterinários podem precisar trabalhar com gatos ferais ou agressivos que possam ferir os tutores ou a equipe. Gatos podem mostrar ansiedade, agressão e medo através de uma variedade de comportamentos. O medo é a causa mais comum de agressão por gatos na clínica veterinária. Aprenda a reconhecer os primeiros sinais e tomar medidas para reduzir ou impedir que o medo aumente. Avalie cuidadosamente a situação para selecionar a ação mais apropriada.

### Técnicas pré-visita

- ❖ Ao marcar consultas, pergunte e registre os comentários do tutor sobre o comportamento do gato (em casa e durante visitas anteriores). Registre na ficha do paciente experiências na clínica sobre o que funciona e o que não funciona.
- ❖ Faça tentativas para diminuir o medo associado a caixa de transporte usando as técnicas descritas anteriormente.
- ❖ Forneça medicação oral para controlar o medo do gato antes de uma visita ao médico-veterinário, se o histórico ou os comentários do tutor sugerirem que isso pode ser útil. Use um benzodiazepínico oral (por exemplo, alprazolam) como um ansiolítico e possível amnésico (note que o uso de benzodiazepínicos podem resultar em agressão). Use medicação contra náusea (por exemplo, maropitant) para gatos com náusea ou êmese induzida por movimento.<sup>51</sup> Evite usar acepromazina pois ele é um sedativo, não um ansiolítico. Isso limita as respostas motoras sem modificar a percepção sensorial; aumenta a sensibilidade a ruídos e pode aumentar a agressão, tornando o gato mais combativo. Protocolos de tratamento específicos variam entre os médicos-veterinários. Consulte um anestesiologista para obter mais informações.

## A contenção química na prática veterinária

A contenção química pode aumentar a segurança e reduzir o estresse para o gato, tutor e equipe veterinária. É sempre melhor utilizar a contenção química preventivamente porque, uma vez que o gato fica agitado, a contenção química é menos eficaz ou confiável. As indicações de contenção química são mostradas abaixo:

### Indicações para contenção química

- ❖ Quando um gato mostra sinais de medo, ansiedade ou agressão, e o procedimento levará mais tempo sem a contenção química.
- ❖ Situações em que você antecipa dor, desconforto ou cirurgia e onde apenas a analgesia não será suficiente.
- ❖ Quando a contenção gentil ou o equipamento de contenção adequado não fornecer segurança suficiente para a equipe.

Medicamentos que são administrados por via intramuscular ou subcutânea são ótimos, pois seu uso requer menos contenção. Use agentes reversíveis, quando possível. Uma opção é usar o regime a seguir,<sup>54</sup> desde que não haja contraindicações:

- ❖ Baixa dose de dexmedetomidina (reversível), combinada com um opioide para sedação. Escolha um opioide com base no grau previsto de sedação e analgesia necessárias. Fármacos agonistas de Mu (OP3) (por exemplo, morfina, hidromorfona) são reversíveis. O butorfanol é de ação curta e pode ser adequado para alguns procedimentos.
- ❖ Adicione um benzodiazepínico (midazolam) por seu efeito hipnótico, sedativo, relaxante muscular e possíveis efeitos amnésicos (também reversíveis).<sup>55</sup>
- ❖ Adicione uma pequena quantidade de quetamina para sedação adicional, se um gato não for suficientemente sedado com a combinação de opioide, dexmedetomidina e midazolam.

Use anestesia geral se a sedação for insuficiente para realizar os procedimentos necessários. Observe que o uso de indução com anestésico inalatório como método de contenção pode significar menos controle das vias aéreas do paciente e traz preocupações sobre outros problemas de segurança para o gato e a equipe.<sup>56</sup>

As opções de contenção química variam entre os médicos-veterinários e vão depender da sinalização do paciente e do seu estado físico. Obtenha aconselhamento de um anestesiologista, se necessário. Uma variedade de recursos contém protocolos específicos.<sup>54</sup> Os sites do *Veterinary Anesthesia and Analgesia Support Group* (Grupo de Apoio à Anestesia e Analgesia Veterinária) e o *American College of Veterinary Anesthesiologists* (Colégio Americano de Anestesiologistas Veterinários) contêm mais informações (consulte a Tabela 1).

O medo é a causa mais comum de agressão em gatos na clínica veterinária. Aprenda a reconhecer os primeiros sinais e tomar medidas para reduzir ou impedir a escalada do medo.

### Trabalhando com o gato na rotina

Quando um gato com medo / ansiedade é esperado, se possível, veja-o imediatamente após a chegada. Experimente uma ou todas as técnicas descritas na seção 'pré-visita', conforme apropriado.

Um análogo sintético do feromônio facial felino pode acalmar os gatos, mas não reduz a luta.<sup>52</sup> Se o gato estiver com dor e / ou for provável que um procedimento cause dor, faça uma pré-medicação com analgésicos, use contenção mínima e divida os procedimentos em etapas menores. Consulte as diretrizes de gerenciamento da dor do AAHA / AAFP para obter informações sobre condições e tratamentos dolorosos pouco reconhecidos em gatos.<sup>22</sup>

Uma variedade de equipamentos estão disponíveis para ajudar no manuseio dos felinos. Reserve-os para momentos em que técnicas mais brandas não são eficazes. Seja sensível à resposta do gato a qualquer item usado e modere conforme necessário. Desinfecte os materiais entre os usos. O uso varia de acordo com as necessidades de cada gato e médico-veterinário:

- ❖ Toalhas ou focinheiras que cobrem os olhos podem acalmar os gatos reduzindo a intensidade dos estímulos visuais. Eles não imobilizam o gato.
- ❖ Luvas podem proteger os braços e mãos humanos até certo ponto. Alguns membros do painel não usam luvas pois elas não controlam o movimento do gato da mesma maneira que as toalhas e podem conter odores que despertam ainda mais o gato.<sup>53</sup>
- ❖ Redes devem ser usadas apenas raramente, como quando é difícil o gato sair de uma gaiola hospitalar para sedação rápida ou em uma emergência para capturar um gato solto. Certifique-se de que é uma rede do tipo concha projetada para a captura de pequenos mamíferos (ou seja, com orifícios muito menores do que uma rede para peixes, para evitar que os dedos do gato fiquem presos nela). Não use uma rede para imobilizar o gato, a menos que o procedimento possa ser concluído em alguns segundos (por exemplo, uma injeção). Grande parte do consenso de especialistas não toleram o uso de redes.
- ❖ Bolsas projetadas para contenção de gatos podem permitir acesso à pata dianteira para punção venosa cefálica e ao ombro dorsal para injeções subcutâneas. Esteja ciente de que colocar um gato em uma bolsa pode ser difícil e que, se apertada, pode levar ao pânico, enquanto uma bolsa solta pode não fornecer restrição suficiente. Envolver o gato em uma toalha pode ser mais confortável e adequado.

## **Voltando para casa**

Quando os gatos retornam para casa, eles podem carregar materiais estranhos (por exemplo, ataduras) ou odores desconhecidos (por exemplo, a eliminação de subprodutos de anestésicos inalatórios pode produzir odores por 24 a 48 horas). Outros gatos podem não reconhecer o gato que está retornando e podem atacá-lo. Para reduzir os problemas, pergunte aos tutores se já ocorreram problemas de reintrodução no passado e considere os procedimentos que foram realizados na clínica veterinária.

### **Dicas gerais para reduzir a agressão entre gatos em casa**

- ❖ Peça aos tutores que tragam algo com o 'cheiro da casa' quando deixarem ou pegarem seu gato (Figura 8).
- ❖ Considere o uso de um análogo sintético de feromônio facial felino na caixa de transporte e em casa.
- ❖ Aconselhe os tutores a serem passivos ao levar o gato para casa (não incentive ou force a interação entre os gatos ou a alimentação comunitária).

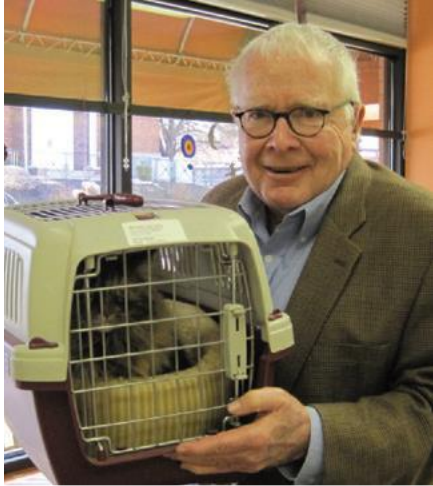

**FIGURA 8** Este gato chegou à clínica com sua cama, que já lhe é familiar. *Cortesia de Dr Eliza Sundahl*

### Onde não há histórico de agressão

Se os gatos não tiverem histórico de agressão após visitas veterinárias, tente estas etapas:

- ❖ Deixe o gato que estiver voltando na caixa de transporte para ver como os outros gatos reagem; se não houver sibilos (fuzz) ou sinais de agressão ou medo, deixe os gatos juntos (com o gato ainda na caixa e sob supervisão) por aproximadamente 5 a 10 minutos.
- ❖ Em seguida, deixe os gatos soltos no mesmo ambiente e monitore qualquer reação. Se ocorrerem sinais de agressão, distraia os gatos para separá-los. Evite ficar entre eles ou pegá-los se estiverem agitados, pois pode ocorrer uma agressão redirecionada.

### Onde a agressão é uma preocupação potencial

Se as reintroduções anteriores levaram à agressão ou se houver uma reação negativa depois de tentar a abordagem acima, recomende que o tutor tente estas etapas:

- ❖ Coloque o paciente em outro cômodo seguro e silencioso (com todos os recursos necessários) por pelo menos 24 horas até que os gatos respondam consistentemente à comida e brincadeiras de ambos os lados da porta.
- ❖ Se os problemas persistirem após uma lenta reintrodução por 3 dias, os tutores devem procurar aconselhamento veterinário sobre introdução mais lenta ou medicamentos para facilitar o processo.

Frequentemente, nessas situações, levar os gatos juntos à clínica para consultas futuras evitará problemas, pois ambos carregarão os odores da clínica.<sup>57</sup>

Tabela 1: Sites e informações úteis on-line para tutores ou equipes veterinárias

| Recurso de informação                                                                                                                                                                                                                                                                                                                                    | URL                                                                                |
|----------------------------------------------------------------------------------------------------------------------------------------------------------------------------------------------------------------------------------------------------------------------------------------------------------------------------------------------------------|------------------------------------------------------------------------------------|
| <b>Associação Americana de Profissionais de Felinos (AAFP)</b><br>✦ Área do tutor com links para explicações médicas e estratégias de gerenciamento<br>✦ Diretrizes veterinárias (por exemplo, atendimento ao gato idoso, estágios da vida, vacinação, controle da dor)                                                                                  | www.catvets.com                                                                    |
| <b>Colégio Americano de Anestesiologistas Veterinários</b><br>✦ Lista de anestesiologistas                                                                                                                                                                                                                                                               | www.acva.org                                                                       |
| <b>Conselho do Catalyst</b><br>✦ Vídeos sobre como levar seu gato ao médico-veterinário e treinamento sobre caixas de transporte<br>✦ Informações sobre cuidados de saúde                                                                                                                                                                                | www.catalystcouncil.org<br>www.catalystcouncil.org/resources/video                 |
| <b>Faculdade de Medicina Veterinária da Universidade de Cornell</b><br>✦ Vídeos do Centro de Saúde Felina de Cornell demonstram adaptação de um gato para aceitar procedimentos como escovar os dentes, administrar medicamentos, aparar unhas, tirar temperatura. As técnicas podem ser adaptadas a outras áreas que podem não ser abordadas nos vídeos | http://partnersah.vet.cornell.edu/pet/cats                                         |
| <b>International Cat Care</b><br>✦ Informações para tutores e criadores de gatos sobre problemas de saúde felinos, questões de comportamento e necessidades ambientais<br>✦ Dicas sobre como dar comprimidos ou líquidos para gatos                                                                                                                      | www.icatcare.org                                                                   |
| <b>Sociedade Internacional de Medicina Felina (ISFM)</b><br>✦ Informações veterinárias formais do site Feline Advisory Bureau (FAB), incluindo "prática amigável para gatos"                                                                                                                                                                             | www.icatcare.org/veterinary                                                        |
| <b>Ohio State University - Iniciativa Indoor Pet</b><br>✦ Informações abrangentes que ajudam tutores e veterinários a entender as comportamentos e requisitos ambientais do gato de estimação e oferecendo estratégias para facilitar o fornecimento de um estilo de vida com menor probabilidade de resultar em doenças relacionadas ao estresse        | http://indoorpet.osu.edu/cats                                                      |
| <b>Grupo de Apoio à Anestesia e Analgesia Veterinária</b><br>✦ Detalhes sobre medicamentos específicos<br>✦ Protocolos de medicação                                                                                                                                                                                                                      | www.vasg.org<br>www.vasg.org/information_by_drug.htm<br>www.vasg.org/protocols.htm |

### Principais pontos:

- ✦ Aumentar os cuidados veterinários para gatos irá melhorar significativamente sua saúde e bem-estar.
- ✦ Os tutores precisam se sentir confiantes em levar seus gatos para os cuidados veterinários.
- ✦ O maior conhecimento sobre o comportamento dos felinos por parte da equipe veterinária pode melhorar as técnicas de manuseio e aumentar a frequência das consultas de rotina.
- ✦ Etapas relativamente pequenas e simples em cada estágio da visita ao médico-veterinário podem torná-la uma experiência significativamente melhor e menos estressante para todos.

Leitura adicional para equipes veterinárias ou tutores

Materiais complementares: Beaver B. Feline behavior: a guide for veterinarians. Saunders, 2003.

Bowen J, Heath S. Behaviour problems in small animals. Elsevier Saunders, 2005.

Bohnenkamp G. From the cat's point of view. Perfect Paws Publishing, 1991.

Heath S. Why is my cat doing that? Hamlyn/Thunder Bay Press, 2009.

Horwitz D, Landsberg G. (Edited for UK by Heath, Mills and Zulch, and for Australia by Seksel). Lifelearn behavior client handouts. [www.lifelearn-cliented.com](http://www.lifelearn-cliented.com).

Horwitz D, Mills D (eds). BSAVA manual of canine and feline behavioural medicine. 2nd edn. British Small Animal Veterinary Association, 2009.

Horwitz D, Neilson J. Blackwell's five-minute veterinary consult. Clinical companion: canine and feline behavior. Blackwell Publishing, 2007.

Landsberg G, Hunthausen H, Ackerman L. Handbook of behavior problems of the dog and cat. 2nd edn. Elsevier, 2003.

Moffat K. Addressing canine and feline aggression in the veterinary clinic. *Vet Clin North Am Small Anim Pract* 2008; 8:983–1003.

Seksel K. Training your cat. Hyland House Publications, 2001.

Yin S. Low stress handling, restraint and behavior modification of dogs & cats (book and DVD). Cattle Dog Publishing, 2009.

#### Reconhecimentos

O AAFP e o ISFM gostariam de agradecer aos laboratórios Boehringer Ingelheim, Nestlé Purina e IDEXX pelo patrocínio dessas diretrizes e pelo compromisso de ajudar a comunidade veterinária a desenvolver projetos que melhorem a vida dos gatos.

#### Referências:

- 1 Flanigan J, Shepherd A, Majchrzak S, Kirkpatrick D, San Filippo M. US pet ownership & demographics sourcebook. Schaumburg, IL: American Veterinary Medical Association, 2007: 1–3.
- 2 Hoyumpa A, Rodan I, Brown M, et al. AAFP–AAHA Feline Life Stage Guidelines. *J Feline Med Surg* 2010; **12**: 43–54.
- 3 Greco DS. The effect of stress on the evaluation of feline patients. In: August JR, ed. Feline internal medicine. Philadelphia: WB Saunders, 1991: 13–17.
- 4 Carlstead K, Brown JL, Strawn W. Behavioral and physiological correlates of stress in laboratory cats. *Appl Anim Behav Sci* 1993; **38**: 143–58.
- 5 Kaname H, Mori Y, Sumida Y, et al. Changes in the leukocyte distribution and surface expression of adhesion molecules induced by hypothalamic stimulation in the cat. *Brain Behav Immun* 2002; **16**: 351–67.
- 6 Jeyaretnam J, Jones H, Phillip M. Disease and injury among veterinarians. *Aust Vet J* 2000; **78**: 625–29.
- 7 Overall KL. Normal feline behavior: clinical behavioral medicine for small animals. St Louis: Mosby, 1997: 45.
- 8 Griffin B, Hume KR. Recognition and management of stress in housed cats. In: August J (ed). Consultations in feline internal medicine. 5th edn. St Louis: Saunders Elsevier, 2006: 717–33.
- 9 Bowen J, Heath S. An overview of feline social behaviour and communication: behaviour problems in small animals: practice advice for the veterinary team. Philadelphia: Saunders, 2005: 29, 31, 164.
- 10 Karsh EB. The effects of early and late handling on the attachment of cats to people. In: Anderson RK, Hart BL, Hart LA (eds). The pet connection. St Paul: Globe Press, 1983: 207–15.
- 11 Crowell-Davis S, Curtis T, Knowles R. Social organization in the cat: a modern understanding. *J Feline Med Surg* 2004; **6**: 19.

- 12 Macdonald DW, Yamaguchi N, Kerby G. Group-living in the domestic cat: its sociobiology and epidemiology. In Turner DC, Bateson P (eds). *The domestic cat: the biology of its behaviour*. Cambridge: Cambridge University Press, 2000: 14, 95.
- 13 Overall K, Panaman R. Behaviour and ecology of free-ranging female farm cats (*Felis catus* L.). *Z Tierpsychol* 1981; **56**: 59–73.
- 14 Griffin B, Hume KR. Recognition and management of stress in housed cats. In August J (ed). *Consultations in feline internal medicine*. 5th edn. St Louis: Saunders Elsevier, 2006: 717–33.
- 15 Passanisi NC, Macdonald DW. Group discrimination on the basis of urine in a farm cat colony. In: Macdonald DW, Müller-Schwarze D, Natynczuk SE (eds). *Chemical signals in vertebrates*. Oxford: Oxford University Press, 1990: 339–41.
- 16 MacDonald DW. The carnivores: order Carnivora. In: Brown RE, MacDonald DW (eds). *Social odours in mammals*. Oxford: Clarendon Press, 1985: 619–722.
- 17 Bradshaw JWS, Hall SL. Affiliative behaviour of related and unrelated pairs of cats in catteries: a preliminary report. *Appl Anim Behav Sci* 1999; **63**: 251–55.
- 18 Soennichsen, S, Chamove AS. Responses of cats to petting by humans. *Anthrozoos* 2002; **15**: 258–65.
- 19 Notari L. Stress in veterinary behavioural medicine. In Horwitz D, Mills D (eds). *BSAVA manual of canine and feline behavioural medicine*. 2nd edn. Gloucester: British Small Animal Veterinary Association, 2009: 136.
- 20 Panksepp J. Affective consciousness: core emotional feelings in animals and humans. *Conscious Cogn* 2005; **14**: 30–80.
- 21 Heath S. Feline aggression. In: *BSAVA manual of canine and feline behavioural medicine*. Gloucester: British Small Animal Veterinary Association, 2002: 216.
- 22 Hellyer P, Rodan I, Brunt J, Downing R, Hagedorn JE, Robertson SA. AAHA/AAFP pain management guidelines for dogs and cats. *J Feline Med Surg* 2007; **9**: 466–80. Available at [www.aahanet.org](http://www.aahanet.org) and [www.catvets.com](http://www.catvets.com).
- 23 AVSAB. AVSAB punishment position statement: The use of punishment for behavior modification in animals. American Veterinary Society of Animal Behavior, 2007. Available at [www.avsabonline.org](http://www.avsabonline.org).
- 24 Rose C, Rodan R, Levy J, Dinnage JD. AAFP position statement: Transport of cats. *J Feline Med Surg* 2010; **12**: 886–87. Available at [www.catvets.com](http://www.catvets.com).
- 25 Berton F, Vogel E, Belzung C. Modulation of mice anxiety in response to cat odor as a consequence of predators diet. *Physiol Behav* 1998; **65**: 247–54.
- 26 Belew AM, Bartlett T, Brown SA. Evaluation of white-coat effect in cats. *J Vet Intern Med* 1999; **13**: 134–42.
- 27 Crowell-Davis SL. White coat syndrome: prevention and treatment. *Compend Contin Educ Pract Vet* 2007; **29**: 163–65.
- 28 Apfelbach R, Blanchard CD, Blanchard RJ, Hayes RA, McGregor IS. The effects of predator odors in mammalian prey species: a review of field and laboratory studies. *Neurosci Biobehav Rev* 2005; **29**: 1123–44.
- 29 Gunn-Moore, DA, Cameron ME, A pilot study using synthetic feline facial pheromone for the management of feline idiopathic cystitis. *J Feline Med Surg* 2004; **6**: 133–138

- 30 Griffith C, Steigerwald E, Buffington C. Effects of a synthetic facial pheromone on behavior of cats. *J Am Vet Med Assoc* 2000; **217**: 1154, 2000.
- 31 Kronen PW, Ludders JW, Hollis NE, et al. A synthetic fraction of feline facial pheromones calms but does not reduce struggling in cats before venous catheterization. *Vet Anaesth Analg* 2006; **33**: 258–265.
- 32 Frank D, Beauchamp G, Palestrini C. Systematic review of the use of pheromones for treatment of undesirable behavior in cats and dogs. *J Am Vet Med Assoc* 2010; **236**: 1308–16.
- 33 Veranic P, Jezernik K. Succession of events in desquamation of superficial urothelial cells as a response to stress induced by prolonged constant illumination. *Tissue Cell* 2001; **33**: 280–85.
- 34 Dalke H, Little J, Niemann E, et al. Colour and lighting in hospital design. *Optics & Laser Technology* 2006; **38**: 343–65.
- 35 Zhao YP, Wang XY, Wang ZC, et al. Essential oil of *Actinidia macros-perma*, a catnip response kiwi endemic to China. *J Zhejiang Univ Sci B*. 2006; **7**: 708–12.
- 36 Todd NB. Inheritance of the catnip response in domestic cats. *J Hered* 1962; **53**: 54–56.
- 37 Stella JL, Lord LK, Buffington CA. Sickness behaviors in response to unusual external events in healthy cats and cats with feline interstitial cystitis *J Am Vet Med Assoc* 2010, **238**: 67–73.
- 38 Robertson S, Lascelles D. Long-term pain in cats: how much do we know about this important welfare issue? *J Feline Med Surg* 2010; **12**: 188–199.
- 39 Brown S, Atkins C, Bagley R, et al. Guidelines for the identification, evaluation, and management of systemic hypertension in dogs and cats. *J Vet Intern Med* 2007; **21**: 542–58.
- 40 Holzworth J. Cat diseases. Philadelphia: WB Saunders, 1987: 5.
- 41 Bennett AD, MacPhail CM, Gibbons DS, Lappin MR. A comparative study evaluating the esophageal transit time of eight healthy cats when pilled with the FlavoRx pill glide versus pill delivery treats. *J Feline Med Surg* 2010; **12**: 286–90.
- 42 Richards JR, Elston TH, Ford RB, et al. The 2006 American Association of Feline Practitioners Feline Vaccine Advisory Panel report. *J Am Vet Med Assoc* 2006; **229**: 1405–41.
- 43 Houpt KA. Domestic animal behavior. 4th edn. Ames, Iowa: Blackwell Publishing, 2005: 177, 240–41.
- 44 Pozza ME, Stella JL, Chappuis-Gagnon AC, Wagner SO, Buffington CA. Pinch-induced behavioral inhibition (‘clipnosis’) in domestic cats. *J Feline Med Surg* 2008; **10**: 82–87.
- 45 Baerends-van Roon JM, Baerends GP. The morphogenesis of the behaviour of the domestic cat: with a special emphasis on the development of prey-catching. Amsterdam, North Holland Publishing, 1979: 12.
- 46 Beaver BV. Feline behavior: a guide for veterinarians. St Louis: Saunders Elsevier, 2003.
- 47 Bradshaw J. Behaviour of cats. In: Jensen P (ed). Ethology of domestic animals. 2nd edn. Oxford, UK: CABI International, 2009: 212.
- 48 Tarttelin M. Restraint in the cat induced by skin clips. *J Neurosci* 1991; **57**: 288.
- 49 Lefebvre L, Sabourin M. Response differences in animal hypnosis: a hypothesis. *Psychol Rec* 1977; **1**: 77–87.
- 50 Klemm WR. Identity of sensory and motor systems that are critical to the immobility reflex (animal hypnosis). *Psychol Rec* 1977; **1**: 145–59.

- 51 Hickman MA, Cox SR, Mahabir S, et al. Safety, pharmacokinetics and use of the novel NK-1 receptor antagonist maropitant (Cerenia™) for the prevention of emesis and motion sickness. *J Vet Pharmacol Ther* 2008; **31**: 220–29.
- 52 Kronen PW, Ludders JW, Erb HN, Moon PF, Gleed RD, Koski S. A synthetic fraction of feline facial pheromones calms but does not reduce struggling in cats before venous catheterization. *Vet Anaesth Analg* 2006; **33**: 258–65.
- 53 Takahashi LK, Nakashima BR, Hong HC, et al. The smell of danger: a behavioral and neural analysis of predator odor-induced fear. *Neurosci Biobehav Rev* 2005; **29**: 1157–67.
- 54 Moffat K. Addressing canine and feline aggression in the veterinary clinic. *Vet Clin North Am Small Anim Pract* 2008; **38**: 983–1003.
- 55 Ebner J, Wehr U, Baumgartner C, Erhardt W, Henke J. Partial antagonization of midazolam-medetomidine-ketamine in cats – atipamezole versus combined atipamezole and flumazenil. *J Vet Med A Physiol Pathol Clin Med* 2007; **54**: 518–21.
- 56 US Department of Labor: OSHA. Anesthetic gases: guidelines for workplace exposures. Revised May 18, 2000: <http://www.osha.gov/dts/osta/anestheticgases>.
- 57 Arakawa H, Arakawa K, Deak T. Sickness-related odor communication signals as determinants of social behavior in rat: a role for inflammatory processes. *Horm Behav* 2010; **57**: 330–41.

Versão original disponível online em [guidelines.jfms.com](http://guidelines.jfms.com), [www.icatcare.org/veterinary](http://www.icatcare.org/veterinary) and [www.catvets.com](http://www.catvets.com)

DISCLAIMER: - This publication is intended as a full and faithful translation of the original English language version. The authors, editors, Societies and Publisher will not accept any legal responsibility for any errors or omissions that may be made in this translation. The Societies and Publisher make no warranty, express or implied, with respect to the material contained herein and accept no liability for any errors made during translation of the article.

AVISO LEGAL: - Esta publicação pretende ser uma tradução completa e fiel da versão original em inglês. Os autores, editores, Sociedades e Editora não aceitarão qualquer responsabilidade legal por quaisquer erros ou omissões que possam ser feitos nesta tradução. As Sociedades e o Editor não oferecem nenhuma garantia, expressa ou implícita, com relação ao material aqui contido e não se responsabilizam por quaisquer erros cometidos durante a tradução do artigo.

Esta Diretriz foi traduzida pela Royal Canin do Brasil a partir da fonte:

**Handling guidelines:** Rodan I, Sundahl E, Carney H, et al. AAFP and ISFM Feline-Friendly Handling Guidelines. *Journal of Feline Medicine and Surgery*, Volume 13, Issue 3, pp364–375. DOI: 10.1016/j.jfms.2011.03.012. © ISFM and AAFP 2011.

<https://journals.sagepub.com/doi/full/10.1016/j.jfms.2011.03.012>. Reprinted by permission of SAGE Publications, Ltd.

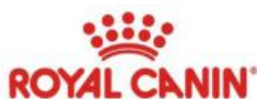

Supplement: sj-pdf-2-jfm-10.1016_j.jfms.2011.03.012.pdf [file sj-pdf-2-jfm-10.1016_j.jfms.2011.03.012.pdf]
