# Supplementary material
Source: PubMed Central journal article supplement (PMC11107994)
Supplement: sj-pdf-3-jfm-10.1016_j.jfms.2011.03.012.pdf [file sj-pdf-3-jfm-10.1016_j.jfms.2011.03.012.pdf]

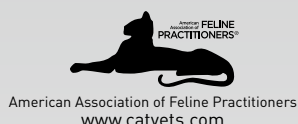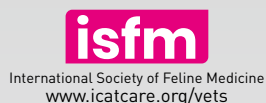

**ИЛОНА РОДАН**  
DVM, DABVP (Feline)  
Соавтор руководства

**ЭЛИЗА САНДАЛ**  
DVM, DABVP (Feline)  
Соавтор руководства

**ХЕЙЗЕЛ КАРНИ**  
DVM, MS DABVP  
(Canine Feline)

**АННА-КЛЭР ГАНЬОН**  
DVM

**САРА ХИТ**  
BVSc, дипл.  
ECVBM-CA, CCAB, MRCVS

**ГАРИ ЛАНДСБЕРГ**  
DVM, MRCVS  
DACVB, DECVBM-CA

**КЕРСТИ СЕКСЕЛЬ**  
BVSc (Hons), MRCVS, FRCVSc  
DACVB, DECVBM-CA

**СОФИЯ ЙИН**  
DVM, MS

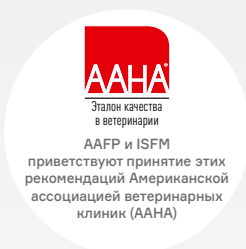

## РЕКОМЕНДАЦИИ AAFP И ISFM\* ПО ПРАВИЛЬНОМУ ОБРАЩЕНИЮ С КОШКАМИ

Rodan I. et al., AAFP and ISFM Feline-Friendly Handling Guidelines, Journal of Feline Medicine and Surgery (2011) 13, 364-375 doi:10.1016/j.jfms.2011.03.012, авторское право © ISFM and AAFP 2011. Перепечатано с разрешения SAGE Publications, Ltd

### ВВЕДЕНИЕ

В большинстве стран кошки становятся все более распространенными домашними животными, а по популярности и численности нередко превосходят собак. Однако при этом кошки получают ветеринарную помощь в меньшем объеме по сравнению с собаками<sup>1</sup>. Редкие визиты в клинику владельцы объясняют тем, что кошку сложно поместить в переноску, сложно возить ее в автомобиле и не менее сложно справиться с испуганным животным в условиях клиники<sup>2</sup>. Повышение информированности владельцев кошек и ветеринарных специалистов и обучение их правильному обращению с кошкой поможет снизить уровень стресса и обеспечить животному надлежащую врачебную помощь. Отсутствие подобной подготовки может привести к тому, что испытываемый животным стресс перерастет в страх или агрессию, связанную со страхом. Полученный стресс может повлиять на результаты врачебного осмотра и результаты лабораторных исследований, привести к постановке неправильного диагноза (например, сахарного диабета), а также неправильному или излишнему лечению<sup>3-5</sup>. При отсутствии участливого и уважительного отношения к кошке со стороны персонала клиники клиент может посчитать, что ветеринарным специалистам не хватает навыков, сочувствия или понимания психологии животных. Возможны случаи травм у кошки, ее владельца или персонала клиники<sup>6</sup>. Чтобы оградить животное от стресса, клиент может выбрать другую клинику или отказаться от дальнейших посещений ветеринарного врача.

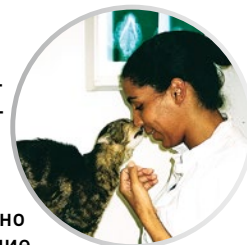

### ЦЕЛИ

Применение методов правильного обращения с кошкой поможет избежать перечисленных проблем. Индивидуальный подход к животному в каждом конкретном случае сделает визит к врачу наиболее успешным. Цель настоящего руководства — предоставить полезную информацию об обращении с кошками, которая поможет достичь следующих результатов:

- снизить тревогу и болевые ощущения у животного;
- укрепить связь между кошкой, ветеринарным врачом и владельцем, повысить уровень доверия и, как следствие, обеспечить более качественное ветеринарное обслуживание животного в течение всей его жизни;
- повысить эффективность, продуктивность и удовлетворенность своей работой персонала клиники;
- улучшить взаимоотношения с клиентом;
- своевременно выявлять медицинские и поведенческие проблемы у животного;
- сократить риск травмирования владельцев или персонала ветеринарной клиники;
- уменьшить беспокойство клиента, связанное с посещением ветеринарной клиники.

### СОЦИАЛЬНОЕ ПОВЕДЕНИЕ И КОММУНИКАЦИЯ

Нередко поведение кошки в стрессовых и конфликтных ситуациях трактуется неверно. Персонал ветеринарной клиники может помочь клиенту сформировать реалистичное представление о поведении кошки и подсказать способы решения проблем. Для начала ознакомьте клиентов и персонал клиники с уникальными социальными и поведенческими особенностями кошек. Помогите им научиться интерпретировать события и ситуации с точки зрения кошки, т. е. «думать, как кошка».

### ПОВЕДЕНЧЕСКИЕ МОДЕЛИ КОШЕК

В прошлом кошек содержали за их способность охотиться на грызунов, поэтому искусственный отбор лишь незначительно повлиял на врожденное поведение этих животных<sup>7,8</sup>. Кошке необходимо удовлетворять охотничий инстинкт, кроме того, охота для кошки — это часть игры. В клинике можно попытаться отвлечь животное с помощью интерактивной игрушки, например, мышки на веревочке.

Кошки — охотники-одиночки, при любой возможности они избегают конфликтов и драк со сво-

\*AAFP — Американская ассоциация практикующих фелинологов, ISFM — Международное общество ветеринарии кошек.

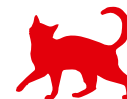

ими сородичами, дистанцируясь от них<sup>9</sup>. В ответ на агрессию кошки часто убегают или прячутся, лишь в крайнем случае вступая в драку. Создание «ощущения укрытия» с помощью полотенца или переноски может облегчить взаимодействие с кошкой в ветеринарной клинике.

Смелость, способность адаптироваться к новым условиям и к взаимодействию у разных кошек могут различаться в зависимости от генетической predisposition и окружающей обстановки. Кошка будет лучше взаимодействовать с человеком, если ее социализация началась в возрасте 2–7 недель<sup>10</sup>. Однако бурное проявление эмоций, грубое обращение, внезапные или хаотичные движения, громкие голоса могут стать причиной неожиданной агрессивной реакции или тревожного поведения кошки.

Кошки — социальные животные, которые преимущественно общаются с представителями своей колонии. Они от природы не способны воспринимать чужаков с первой встречи<sup>11–13</sup>.

Являясь в природе и охотником, и добычей, кошка может испытывать страх и демонстрировать защитное поведение, оказавшись в незнакомой обстановке или с незнакомыми людьми<sup>11,14</sup>. Признаки тревожного поведения могут быть как скрытыми (неочевидными), так и явными (легко заметными).

В тактильную коммуникацию кошки вступают только со своими сородичами, членами той же социальной группы. Чтобы продемонстрировать свою принадлежность к одной социальной группе и поддерживать свойственный ей запах, кошки трутся друг о друга (такое поведение по отношению к человеку

### РАННИЕ ПРИЗНАКИ СТРАХА И ТРЕВОГИ

Большинство сотрудников ветеринарных клиник способны распознать мимические и поведенческие сигналы потенциальной агрессии, спровоцированной страхом. Ниже показаны признаки, по которым персонал ветеринарной клиники может определить, что кошка испытывает нарастающий страх. Если в этот момент предпринять правильные действия, можно предупредить вспышку агрессии.

#### ПОЗЫ

Кошка демонстрирует признаки усиливающегося страха при приближении сотрудника клиники. На следующих изображениях показано, как меньше чем за минуту менялась поза кошки. Успокоить кошку удалось, отвлекая ее внимание.

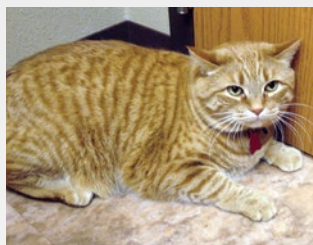

◀ Ассистент находится примерно в двух метрах от кошки. Кошка демонстрирует первые признаки страха и тревоги, слегка разворачивая и прижимая уши. Спина начинает выгибаться. Обратите внимание, что на морде появилось слегка напряженное выражение. В этот момент сотруднику следует принять меры, чтобы успокоить кошку.

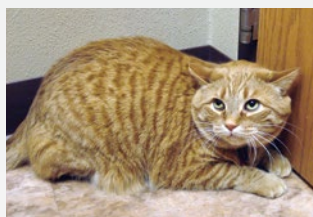

◀ Нарастающий страх выражается в смене позы: кошка подбирает лапы под себя, пригибая голову и как бы уменьшаясь в размерах.

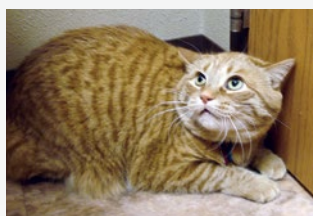

◀ Кошка готовится к нападению. Спина изогнута сильнее, уши сильнее прижаты к голове, что дает основание предположить, что животное настроено более враждебно (несколько секунд спустя кошка зашипела, как бы предупреждая о готовности наброситься).

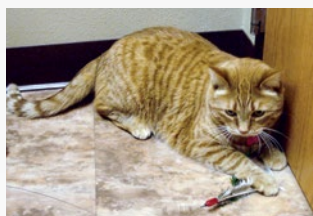

◀ Ассистент изменил тактику, отвлекая кошку любимой игрушкой. Обратите внимание, лапа вытянута вперед, уши направлены вверх. Спина животного больше не изгибается, кошка приняла более расслабленную позу.

#### МИМИКА

На увеличенных изображениях видно, как изменяется выражение морды по мере усиления страха. При появлении этих признаков нужно принять меры, чтобы успокоить животное.

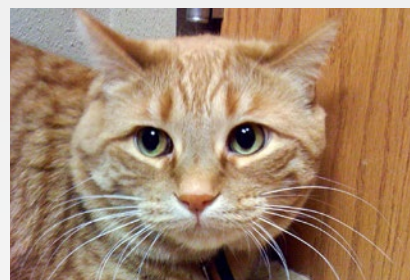

▶ Расширенные зрачки и немного отведенные в стороны/прижатые уши — признаки усиления страха.

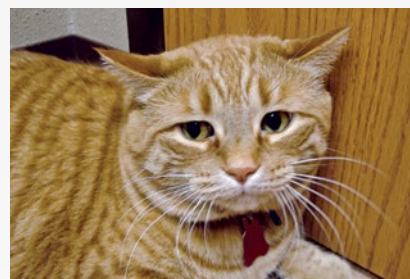

▶ Несколько суженные или вытянутые зрачки, прижатые и направленные вперед уши, более напряженная челюсть свидетельствуют о нарастающей тревоге и страхе.

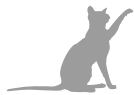

часто ошибочно трактуется как выпрашивание еды или привлечение к себе внимания) или вылизывают друг друга (обычно в области головы и шеи)<sup>15,16</sup>.

Большинству кошек приятны прикосновения к голове и шее. Попытки иначе приласкать кошку могут привести к раздражению и даже агрессии (например, чрезмерное перевозбуждение и спазмы кожи при поглаживании по спине; сжатие рук человека когтями при прикосновении к животу)<sup>11,17,18</sup>.

## КАК РАСПОЗНАТЬ ТРЕВОГУ И СТРАХ У КОШКИ

Страх — естественная реакция, позволяющая избежать потенциальной угрозы<sup>9</sup>. Тревога, в свою очередь, вызвана ожиданием неприятного события. Это предчувствие связано с ранее полученным негативным, психологически травмирующим или болезненным опытом<sup>19</sup>. С опытом можно научиться улавливать едва заметные ранние признаки страха или тревоги (см. выше) и обусловленной ими агрессии<sup>20</sup>. Своевременное распознавание этих признаков позволяет принять меры, чтобы не допустить вспышки ярко выраженной агрессии. Понаблюдав за сменой поз кошки, положением ее ушей и характерными движениями хвоста, легко судить о ее настроении<sup>9,21</sup>. Изменение взгляда и мимики животного также является своеобразным предупреждением о нарастающем волнении. При страхе или перевозбуждении у кошек сильно потеют подушечки лап. Кроме того, страх и волнение часто сопровождаются изменением тембра звуков, издаваемых животным, — от жалобного мяуканья до утробного рычания и шипения.

Кошкам не свойственно уступать друг другу в конфликте, вместо этого они или убегают, или вступают в драку, или демонстрируют замещающее поведение (например, начинают умыться). Если кошка не сопротивляется и молча застывает в неподвижности, это не значит, что она не испытывает боли или страха. Замирая в одной позе, кошка дает понять, что ей некомфортно или беспокойно<sup>22</sup>.

## ПОДГОТОВКА ВЛАДЕЛЬЦА И ЖИВОТНОГО К ВИЗИТУ В ВЕТЕРИНАРНУЮ КЛИНИКУ

Не жалейте времени, чтобы приучить кошку к поездкам в ветеринарную клинику и манипуляциям со стороны врача — это поможет сделать последующие визиты намного более комфортными для животного. Персонал клиники совместно с владельцем могут разработать стратегии подготовки к предстоящим мероприятиям. По возможности персоналу и/или владельцу следует:

- **Организовать ряд пробных поездок в ветеринарную клинику**, чтобы познакомить кошку с клиникой и дать ей адаптироваться к пребыванию среди

незнакомых людей и других кошек. Создайте позитивные ассоциации, например с помощью лакомств. Посещая клинику, при каждой возможности поощряйте кошку, когда она ведет себя правильно. Откажитесь от наказаний (вербальных или физических), так как они могут привести к таким нежелательным последствиям, как чрезмерная возбудимость или переадресованная агрессия<sup>23</sup>.

- **Пройти специальный курс обучения** — они могут быть для котят или для их владельцев. Такие уроки позволяют получить представление о том, как правильно подготовить котенка к знакомству с другими людьми и смоделировать множество благоприятных ситуаций.
- **Провести «репетицию» клинического обследования** и научиться самостоятельно выполнять дома некоторые процедуры, не забывая хвалить и подкреплять все действия положительными стимулами — лакомствами или другим способом поощрения (например, поиграть, почесать за ухом или под подбородком). Все процедуры следует проводить спокойно и осторожно, как это делают сотрудники ветеринарной клиники:
  - обрабатывать лапы и осматривать уши, чтобы подготовиться к стрижке когтей и обследованию ушей;
  - приучить открывать пасть в ожидании лакомства, чтобы подготовить ее к осмотру полости рта, принятию лекарств или чистке зубов;
  - ощупывать лапы и туловище животного, чтобы подготовить к осмотру;
  - проводить груминг;
  - проводить дома такие регулярные медицинские процедуры, как обработка от паразитов, измерение уровня глюкозы в крови при диабете и т.п.
- **Приучить кошку к переноске**. Время от времени совершать непродолжительные поездки на машине вместе с животным, по возможности начиная с раннего возраста.
- **Заблаговременно помещать кошку в переноску** в назначенный день визита, чтобы избежать опозданий; создать условия для того, чтобы кошка самостоятельно зашла в переноску.
- **Взять с собой вещи, которые имеют знакомый для кошки запах**, например, любимую подстилку или игрушки.
- **Заранее предупредить персонал клиники**, если кошка легко выводится из эмоционального равновесия. Это даст сотрудникам клиники возможность подготовиться к приему (немедленно отнести кошку в смотровой кабинет, приготовить для нее лакомства и игрушки, чтобы отвлечь). В этой ситуации персонал должен проявить достаточную гибкость и найти решение, которое подходит конкретному клиенту и конкретной кошке. Например, некоторые кошки легче переносят процедуры на дому, чем в клинике.
- **Понимать, что переживания владельца влияют и на поведение кошки**, стараться сохранять спокойствие и не показывать тревогу или страх.

... ПОЗВОЛЬТЕ КОШКЕ ПОЧУВСТВОВАТЬ СЕБЯ  
В БЕЗОПАСНОСТИ, ЧТОБЫ ВИЗИТ В ВЕТЕРИНАРНУЮ  
КЛИНИКУ ПРОШЕЛ СПОКОЙНО.

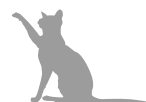

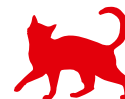

## ПЕРЕНОСКИ ДЛЯ КОШЕК

Во время транспортировки переноска обеспечивает безопасность как владельца, так и кошки<sup>24</sup>. Кроме того, она позволяет животному чувствовать себя защищенно, спрятавшись в надежном, закрытом контейнере. Чтобы выяснить, какие переноски являются самыми лучшими, проводят опросы среди владельцев. В любом случае она должна быть прочной, надежной, устойчивой, удобной для переноса и тихо открываться и закрываться, чтобы не испугать кошку. Некоторые кошки любят наблюдать за тем, что происходит вокруг, а другим более комфортно «в укрытии». Переноска должна быть сконструирована таким образом, чтобы кошку можно было без труда вынуть из нее, если она не выходит самостоятельно, или чтобы можно было провести осмотр, когда животное находится внутри. Для склонных к страху или агрессии кошек подходит контейнер со съемной крышкой. Такая переноска также станет лучшим выбором для кошек с ограниченной подвижностью, больных или испытывающих боль животных.

Во время транспортировки переноска обеспечивает безопасность как владельца, так и кошки, а также позволяет животному чувствовать себя в безопасности.

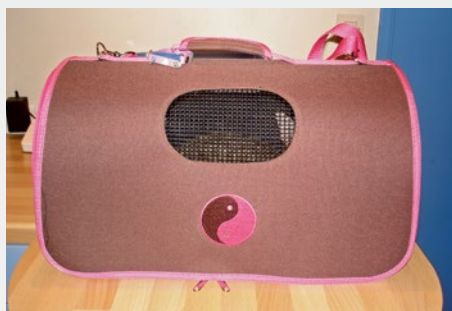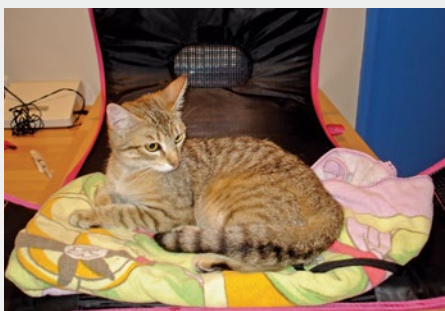

▲ Существует много вариантов переносок; в данном случае представлена переноска с расстегивающейся молнией, которую можно открывать постепенно, позволяя кошке остаться на своей подстилке.

Фото Anne-Claire Gagnon.

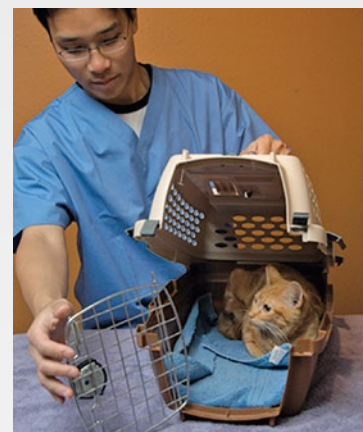

▲ Более традиционная переноска со съемной крышкой и передней дверцей.

Фото Sophia Yin.

## КАК ПРИУЧИТЬ КОШКУ К ПЕРЕНОСКЕ

Цель обучения — создать у кошки позитивные ассоциации с переноской, чтобы она заходила в нее без принуждения. Сделайте переноску частью интерьера, подстелите внутри мягкую ткань для большего уюта. Если кошка положительно реагирует на лакомства, кошачью мяту и/или игрушки, положите их в открытую переноску, чтобы завлечь животное. Некоторые владельцы считают, что полезно приучить кошку заходить в переноску по условному сигналу (при звуках специального слова или по щелчку кликера). Кошки по-разному относятся к лакомствам; используйте их только в том случае, если они помогают снизить стресс или тревогу.

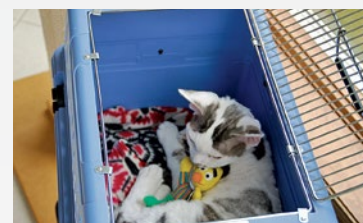

▲ Спокойный котенок с любимой игрушкой.

Фото Ilona Rodan.

## КАК ПОМЕСТИТЬ КОШКУ В ПЕРЕНОСКУ, ЕСЛИ ОНА СОПРОТИВЛЯЕТСЯ

Если кошка еще не привыкла к переноске, но уже запланирован визит в клинику, разработайте стратегию с учетом типа переноски и домашней обстановки. Поставьте переноску в небольшое помещение, где мало мест, чтобы спрятаться, тогда кошка может выбрать ее в качестве укрытия. Попробуйте распылить в переноску синтетический аналог феромона лицевых желез кошки как минимум за 30 минут до транспортировки, чтобы успокоить животное. Положите внутрь знакомую подстилку, игрушку и/или лакомство. Поощряйте кошку, чтобы она самостоятельно зашла в переноску, без принуждения с вашей стороны. При необходимости снимите верхнюю крышку, пока кошка еще не залезла в контейнер, а после этого спокойно закройте его.

## ТРАНСПОРТИРОВКА ПЕРЕНОСКИ В АВТОМОБИЛЕ

Перед поездкой в клинику потренируйтесь поднимать переноску, размещать ее в салоне и вынимать из машины. Сначала проверьте, не сдавливается ли пустой контейнер, не слишком ли он сотрясается во время движения, и лишь затем поместите внутрь кошку. Зафиксируйте переноску с помощью ремня безопасности или поставьте на пол. Любое движение переноски во время поездки может напугать кошку. Накрыв переноску полотенцем, можно предупредить тревогу, связанную со зрительным перевозбуждением.

**ЦЕЛЬ ОБУЧЕНИЯ — ДОБИТЬСЯ, ЧТОБЫ КОШКА ЗАХОДИЛА В ПЕРЕНОСКУ БЕЗ ПРИНУЖДЕНИЯ.**

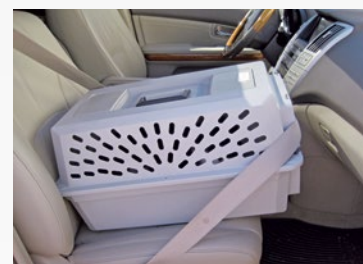

▲ Переноска, зафиксированная ремнем безопасности.

Фото Eliza Sundahl.

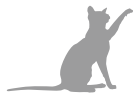

## ОСНОВНЫЕ ПРИНЦИПЫ СОЗДАНИЯ ПОЗИТИВНОЙ АТМОСФЕРЫ В КЛИНИКЕ

### КОНТРОЛИРУЙТЕ ИНТЕНСИВНОСТЬ ЗАПАХОВ

Своевременно очищайте поверхности, мойте руки и удаляйте волоски шерсти перед приемом нового пациента — это позволит устранить неприятные запахи. Проветривайте помещение после любых действий, влияющих на запах (например, убирайте все после очищения параанальных желез, протирайте зоны, где кошка ходила или терлась о мебель)<sup>25</sup>. Кошки обладают развитым обонянием — это чувство лежит в основе многих их поведенческих реакций. Некоторые запахи (например, освежители воздуха, дезинфицирующие средства, медицинский спирт, кровь, дезодорант, духи) или запах незнакомой одежды могут обострить тревогу или страх<sup>26–28</sup>.

### ПОДУМАЙТЕ О ПРИМЕНЕНИИ СИНТЕТИЧЕСКИХ АНАЛОГОВ КОШАЧЬИХ ФЕРОМОНОВ

Согласно исследованиям, синтетический аналог феромона (FFP) стабилизирует эмоциональное состояние кошки в стрессовых ситуациях, уменьшает беспокойство, страх и агрессию, нормализует аппетит и груминг у кошек, содержащихся в клетках<sup>29–32</sup>. Положительную роль могут также сыграть ароматодиффузоры, размещенные на территории клиники, а также распыление спрея за 30 минут до приема. Используйте аналог феромона лицевых желез кошки лишь в качестве дополнения, но никак не вме-

сто уборки, мер по устранению запахов, бережного обращения с кошкой или других условий, создающих комфортную среду для кошки.

### КОНТРОЛИРУЙТЕ ЗВУКОВЫЕ И ВИЗУАЛЬНЫЕ СТИМУЛЫ

Минимизируйте количество зрительных сигналов, которые могут стать источником беспокойства для кошки. Постарайтесь исключить других пациентов из поля зрения кошки. По возможности организуйте отдельный вход для клиентов с кошками, а также отдельную приемную и зону ожидания. Накрывайте переноски одеялом или полотенцем. Используйте приглушенный свет<sup>33,34</sup>. Проводите осмотр в спокойной обстановке и говорите спокойным голосом. По возможности уменьшите звуки, которые могут напугать кошку, например телефонный звонок или шум вентилятора. Можно использовать успокаивающую фоновую музыку.

### ЕСЛИ В КЛИНИКЕ ЖИВЕТ КОШКА...

Необходимо понимать, что ее появление, звуки и запахи могут вызвать тревогу у кошек-пациентов. Персонал клиники должен уметь распознавать признаки стресса как у живущей в клинике кошки, так и у кошки-пациента, чтобы вовремя среагировать или не допустить эту кошку в помещение, где находятся пациенты.

- **Сохранять позитивный настрой**, подстраиваться к темпу реакции кошки, наблюдать за ее коммуникативными сигналами и подкреплять правильное поведение лакомством, игрушкой или лаской.
- **При необходимости дать кошке назначенные седативные или противорвотные средства.**
- **Заранее спланировать возвращение домой** (см. раздел «Возвращение домой»).

Дополнительные источники информации можно найти в **Таблице 1** и в разделе «Рекомендуемая литература».

## СОЗДАНИЕ ОБСТАНОВКИ В КЛИНИКЕ

### Основы комфортного пребывания кошки в клинике

Некоторые ключевые принципы комфортного пребывания кошки в клинике изложены выше.

### Приемная/зона ресепшн

Сократите время ожидания, осуществляя прием по записи. По возможности составьте расписание таким образом, чтобы:

- принимать кошек в более спокойное время дня;
- принимать кошек и собак в разное время дня;
- проводить операции у кошек и собак в разные часы/дни.

Пригласите клиента с кошкой в смотровой кабинет как можно быстрее, чтобы избежать встречи с другими животными и шума. Если это невозможно, ограничьте контакт кошки с собаками и другими кошками

ми в приемной. Вы можете попросить владельцев собак и кошек разместиться в разных частях зала ожидания, использовать ширму, чтобы разграничить зоны ожидания, или проводить владельца с кошкой в альтернативный зал (при наличии). Не ставьте переноски на пол (обустройте специальную полку на достаточной высоте от пола или используйте прочный стул, повернув его спинкой к другим животным). Подготовьте одеяло или полотенце, чтобы при необходимости закрыть переноску.

### Смотровая/кабинет врача

Если в клинике помимо кошек обслуживаются и другие животные, постарайтесь выделить хотя бы один кабинет исключительно для кошек. Проявляйте гибкость в выборе места осмотра (например, на смотровом столе, весах, стуле, кушетке или на полу); проводите обследование в наиболее удобном для кошки месте (**Рисунок 1**).

Для устранения потенциальных обонятельных сигналов, таких как феромоны тревоги, пользуй-

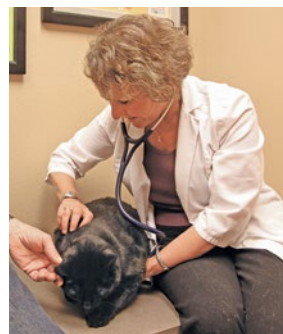

◀ **Рисунок 1.** Проводите осмотр кошки там, где это наиболее удобно для нее, например на кушетке в смотровой.  
Фото Ilona Rodan.

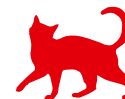

тесь дезинфицирующими моющими средствами или порошками, удаляющими как белок, так и жир, входящие в состав феромонов. Держите под рукой разнообразные лакомства, одноразовые/подарочные игрушки и/или обработанные раствором кошачьей мяты полотенца, чтобы заинтересовать кошку и вовлечь ее в процесс. Реакция на кошачью мяту и растения того же вида может различаться в зависимости от генетических особенностей<sup>35,36</sup>.

## Клетки для кошек в ветеринарной клинике

По возможности выделите отдельные помещения для содержания кошек. Оптимальная клетка должна обладать следующими характеристиками:

- Быть достаточно просторной, чтобы в ней разместилась переноска, а лоток находился на удалении от мисок с водой, едой и подстилки.
- Должна располагаться на возвышении. Лучше размещать клетки в ряд, чем напротив друг друга, т. к. в этом случае кошки друг друга не видят и, следовательно, не получают тревожных визуальных сигналов<sup>37</sup>.
- В ней должно быть надежное укрытие (например, устойчивая картонная коробка), куда кошка может залезть и спрятаться. Если кошке более спокойно в темном месте, накройте переднюю стенку клетки полотенцем.
- Иметь хорошую тепло- и звукоизоляцию. Клетки из стекловолокна лучше удерживают тепло, имеют более матовую поверхность, меньшую проводимость звука по сравнению с клетками из нержавеющей стали.
- В ней должна быть знакомая для кошки подстилка и/или игрушка из дома.
- Корм и лоток должны быть такими, как предпочитает кошка (поскольку это не всегда возможно организовать для каждого пациента, используйте этот метод в случае, если животное нервничает или боится. Возможно, стоит попросить клиента принести корм для кошки из дома).

## ВЗАИМОДЕЙСТВИЕ С КОШКОЙ В ВЕТЕРИНАРНОЙ КЛИНИКЕ

### Подготовка к встрече с кошкой

Успех текущего и последующих визитов зависит от первого контакта кошки с ветеринарным врачом. По возможности задействуйте сотрудников, специально отвечающих за работу с кошками. Приветствуя владельцев, обращайтесь к ним по имени, а к кошкам по кличке, используйте умеренную жестикуляцию и говорите спокойным тоном.

Узнайте обо всех особых нуждах кошки-пациента до начала приема. Игривых котят несложно отвлечь игрушками или лакомствами. Кошки среднего возраста и пожилые часто страдают от возрастных заболеваний суставов и чувствуют себя комфортно только на мягкой поверхности. Учтите, что интенсивность боли при наличии хронических заболеваний может возрастать<sup>38</sup>.

По возможности подготовьте все необходимое оборудование заранее, до появления кошки. Чтобы избежать лишних жестов и шума, держите наготове все материалы (например, освободите шприцы от упаковки). Пользуйтесь «бесшумными» ножницами.

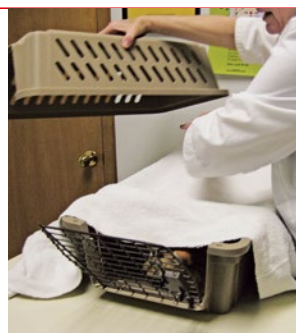

❖ **Рисунок 2.** Если кошка предпочитает оставаться в переноске, то накройте переноску полотенцем, сняв крышку. Это поможет успокоить кошку. Это будет первым шагом и в том случае, если кошка проявляет агрессию и нужно завернуть ее в полотенце.  
*Фото Eliza Sundahl.*

Придерживайтесь принципа «медленно, но верно». В работе с большинством кошек неспешное установление контакта позволяет достичь наилучших результатов. Ведите себя доброжелательно и спокойно и будьте последовательны в обращении с животным.

### Как открыть переноску для осмотра кошки

Откройте дверцу переноски, пока вы заполняете историю болезни. Возможно, кошка решится выйти самостоятельно. Некоторые кошки с большей охотой выходят из переноски, если она находится на полу. Если кошка уже вне контейнера, уберите закрытую переноску из поля зрения кошки на время осмотра, но не забудьте вернуть ее на место сразу по окончании процедур. Если вы имеете дело со спокойной кошкой, которую не пугает происходящее, можно позволить ей свободно перемещаться по кабинету\*.

Если кошка все еще находится в переноске, когда вы уже закончили заполнять историю болезни, осторожно снимите верхнюю крышку и переднюю панель (по возможности). Большинству кошек очень комфортно находиться в переноске со снятой верхней частью, что облегчает обследование.

Если кошка проявляет признаки страха, снимите крышку и накройте переноску полотенцем; таким образом, кошка окажется под своеобразным навесом, что, однако, не мешает осмотру (**Рисунок 2**).

Конструкция некоторых переносок не позволяет снимать крышку. Существуют разные мнения о том, как безопасно извлекать кошку из переноски такого типа, не причиняя ей стресса, однако ни одно из них не кажется достаточно обоснованным. Если кошка отказывается выйти самостоятельно, но не оказывает сопротивления, попробуйте нижеперечисленные методы.

### Если кошка не выходит из переноски

- Осмотрите кошку в переноске, насколько это возможно (**Рисунок 3**).
- Не вытаскивайте кошку насильно. Не переворачивайте переноску, чтобы вытрясти из нее кошку. Не используйте сумку, сетку или перчатки для кошек (см. далее), если животное ведет себя спокойно.
- Протяните руку и подтолкните кошку за низ живота, чтобы подтолкнуть ее переместиться вперед.
- Если кошка испытывает страх, аккуратно оберните ее полотенцем и достаньте из переноски.
- Если кошка продолжительное время оказывает сопротивление или демонстрирует признаки страха, воспользуйтесь советами, приведенными в разделе об успокоительных средствах и о том, как справиться с агрессией/страхом у кошки.
- Обсудите выбор переноски с клиентом.

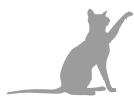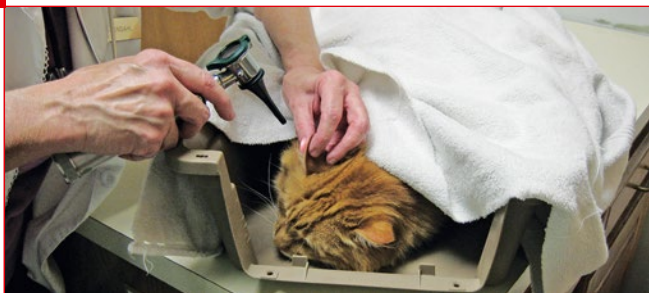

▲ **Рисунок 3.** Осмотр кошки прямо в переноске может быть для нее более комфортным. Фото Eliza Sundahl.

### Как распознать и правильно ответить на коммуникативные сигналы кошки

Оценить свои действия можно по реакции кошки, ее языку тела (**Рисунок 4**). Принимайте во внимание ранние признаки возбуждения; при необходимости проводите длительные процедуры в несколько этапов, чтобы не усиливать чувство страха у кошки. Если кошка подает сигналы опасения, замедлите свои действия или сделайте перерыв, чтобы избежать чрезмерного возбуждения. Для некоторых кошек внезапная остановка и последующее возобновление процедур станут дополнительным стрессом, даже при премедикации; таким животным необходимы седативные средства или наркоз. Если применять седативные средства с амнезийным эффектом (например, бензодиазепин), то со временем можно скорректировать поведение таких кошек.

Попробуйте угостить кошку лакомством или использовать искусственный аналог феромона лицевых желез кошки. Оцените степень стресса, который животное может получить в результате нескольких процедур, и корректируйте время, затрачиваемое на каждый этап, если кошка начинает нервничать. Как можно раньше определитесь со стратегией и будьте готовы изменить тактику, если у кошки разовьется тревожность (см. далее, как справиться с агрессией/страхом у кошки). Рассмотрите следующие варианты:

- поместить кошку в стационар, чтобы провести дополнительные процедуры позже;
- использовать успокоительные средства;
- назначить повторный прием, когда будет возможность применить более эффективную стратегию (например, для проведения премедикации).

Всегда старайтесь заканчивать прием на положительной ноте, по возможности успокоив клиента и кошку.

### Проведение осмотра и обращение с кошкой

Изучите как можно больше вариантов проведения каждой из процедур и учитывайте при выполнении индивидуальные особенности каждого пациента.

Подстелите под лапы кошки полотенце или нескользкий коврик или поместите кошку на знакомую ей подстилку из переноски; последний вариант предпочтительнее, т. к. благодаря знакомому запаху кошка сможет почувствовать себя в большей безопасности в клинике.

- Осмотрите кошку, держа ее на коленях (лучше на своих). Кошку нужно развернуть головой к владельцу, задней частью к себе. Кошка должна чувствовать под собой подстилку, подстилка также

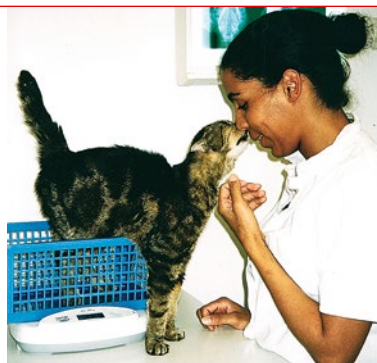

♦ **Рисунок 4.** Кошки отводят уши назад по разным причинам; эта кошка довольна и расслаблена. Фото Anne-Claire Gagnon.

всегда должна быть у вас на коленях. Поддерживайте кошку телом и рукой.

- Позвольте кошке остаться в выбранном ей положении.
- Сила вашего прикосновения должна соответствовать реакции кошки. Кошке наиболее приятны прикосновения к голове и шее; положив руку на голову кошки и слегка погладив зону между глаз или нижней части ушей, можно помочь ей расслабиться (**Рисунок 5**). Некоторые кошки успокаиваются, если положить им руку на грудную клетку.
- Заверните кошку в полотенце или накройте ее голову одеялом (**Рисунок 6**), это может создать у нее ощущение защищенности.
- По возможности выполняйте процедуры в смотровом кабинете<sup>39</sup>. Большинство клиентов предпочитают присутствовать при осмотре, однако если

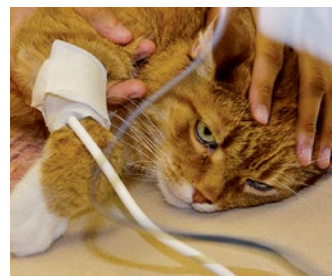

♦ **Рисунок 5.** Массаж или поглаживание кошки по голове может снизить напряжение у животного во время измерения кровяного давления. Большой палец и мизинец удерживают голову кошки с обеих сторон, блокируя движение и предотвращая возможную травму. Фото Ilona Rodan.

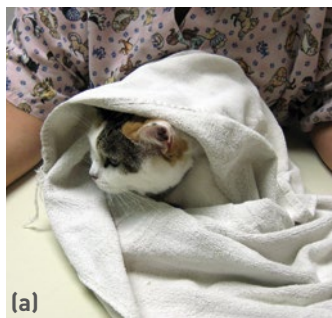

(a)

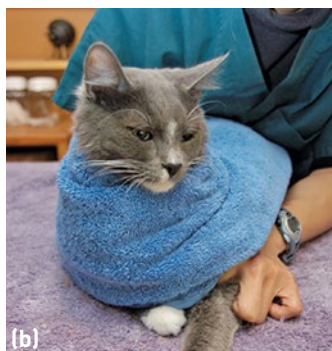

(b)

♦ **Рисунок 6.** (a) Обернув кошку полотенцем, можно создать у нее ощущение большей защищенности. Так она чувствует себя более уверенно, чем сидя в переноске или обследуя кабинет. (b) С помощью полотенца можно контролировать движения кошки. На фото показана поза, оптимальная для процедуры черепной венопункции. Фото Eliza Sundahl (a) и Sophia Yin (b).



## Как вести себя, чтобы не напугать кошку

- Избегайте прямого зрительного контакта.
- Двигайтесь медленно и осматривательно; сведите к минимуму жестикуляцию.
- Будьте на одном уровне с кошкой. Все нужные действия совершайте сбоку, стараясь не нависать над кошкой.
- Говорите тихо и спокойно. Оживленные обсуждения могут увлечь клиента, но наверняка напугают кошку.
- Если кошка нервничает, верните ее в переноску до того, как начать давать рекомендации клиенту, если не требуется продемонстрировать какой-либо прием на животном.
- Контролируйте эмоции, так как они могут повлиять на поведение кошки.

причиной волнения кошки является непосредственно клиент, вежливо попросите его покинуть помещение и закончите процедуру.

## Уменьшение стресса от медицинских процедур

- Если нужно провести несколько процедур, начните с менее инвазивных воздействий или тех, что вызовут меньший стресс<sup>40</sup>.
- Если возможно, используйте разные способы введения лекарств. Покажите клиенту, как давать животным таблетки, расскажите о специально предназначенных для этого устройствах, о еде и лакомствах, в которых можно спрятать препараты<sup>41</sup>.
- Нагрейте препараты для инъекций до комнатной температуры, если это не повлияет на их свойства.
- Набирайте препарат в шприц одной иглой, а для инъекций используйте другую, меньшего диаметра<sup>42</sup>.
- Если голова и тело животного находятся в естественном положении, то для проведения таких процедур, как пункция мочевого пузыря (**Рисунок 7**) или прокол яремной или головной (подкожной) вен потребуется минимальная фиксация.
- Если животное чувствительно к уколам и/или необходимо сделать несколько инъекций, можно использовать местную анестезию или трансмукозальный опиоид.

## СПОСОБЫ ОБРАЩЕНИЯ С ПУГЛИВЫМИ ИЛИ АГРЕССИВНЫМИ КОШКАМИ

Ветеринарным врачам приходится работать с дикими и беспокойными кошками, которые могут поранить владельца или персонал клиники. Животные показывают свою боязнь, тревогу или агрессию разными способами. Страх — основная причина агрессивного поведения кошек в ветеринарной клинике. Научитесь распознавать его на ранних стадиях и принимать соответствующие меры, используйте разные способы в зависимости от ситуации.

### До визита в клинику

- При записи на прием уточните у клиента об особенностях поведения его питомца дома и во время предыдущих визитов. Запишите в амбулаторной

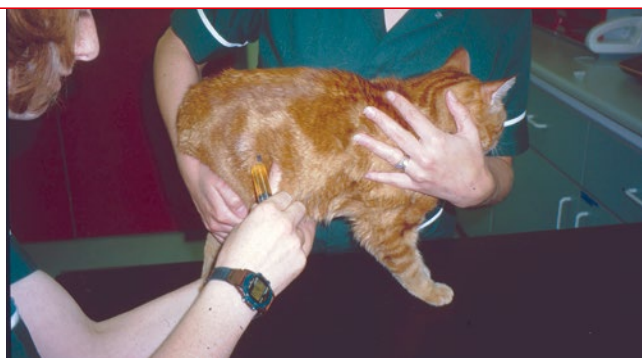

▲ **Рисунок 7.**

Многие процедуры требуют минимальной фиксации, если кошка находится в естественном положении. Пункция мочевого пузыря стоя.  
*Фото Daniëlle Gunn-Moore.*

карте, какие способы обращения с животным работают, а какие нет.

- Постарайтесь уменьшить страх, вызванный транспортировкой в переноске, используя описанные выше приемы.
- Подготовьте оральные успокоительные препараты, если согласно записям в карточке животного или комментариям владельца они могут понадобиться. Используйте бензодиазепин для орального применения (например, альпразолам) как анксиолитическое средство (с возможным амнезийным эффектом). Имейте в виду, что бензодиазепин может вызывать дезингибирование агрессии. Используйте противорвотные препараты (например, маропитант) для животных, которых укачивает в дороге. Избегайте применения ацепромазина — это седативный препарат, а не анксиолитик. Он ограничивает двигательные реакции, никак не влияя на ощущения. От этого увеличивается чувствительность к шуму, возможен рост уровня агрессии. Специальные протоколы лечения могут различаться в зависимости от страны или методов терапии, которых придерживается ветеринарный врач. За дополнительной информацией обращайтесь к анестезиологу.

### Обращение с кошкой в клинике

Если известно, что на прием принесут пугливую/тревожную кошку, постарайтесь осмотреть ее сразу по прибытии. Попробуйте применить все или некоторые из способов, описанных в разделе «До визита в клинику».

Синтетические кошачьи феромоны лицевых желез помогут успокоить животное, но это не значит, что оно не будет сопротивляться врачу<sup>52</sup>. Если кошке больно и/или предстоящая процедура может быть болезненной, применяйте анальгетик, держите животное как можно аккуратнее, разделяйте процедуру на небольшие этапы. Обратитесь к руководству по уменьшению боли от ААНА/AAFP, чтобы узнать о малоизвестных болезненных состояниях кошек и их лечении<sup>22</sup>.

Существуют различные типы оборудования для фиксации кошек. Используйте их, когда более мягкие методы не дают эффекта. Внимательно следите за реакцией животных на оборудование, при необходимости вносите коррективы. Дезинфицируйте материалы перед использованием. Применение средств, перечисленных ниже, зависит от потребностей кошки и ветеринарного врача.

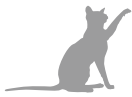

## О СПОСОБАХ ФИКСАЦИИ ЗА ХОЛКУ

Существует множество способов взять животное за кожу холки — от аккуратного сжатия до захвата большого количества кожи с разной степенью давления. Изучение естественного поведения кошек поможет выбрать правильную технику. Они берут друг друга за загривок только в строго определенных обстоятельствах<sup>43,44</sup>. Кошка может таким способом переносить котят в пасти в первые недели их жизни<sup>45</sup>. Она делает это для обездвиживания детеныша во время переноса, а не в качестве воспитательной меры или наказания. Самец во время спаривания также хватается за кожу на холки самки<sup>46,47</sup>.

Некоторые ветеринарные врачи и зоопсихологи не берут животных за холку и не одобряют этот метод. Они считают, что использование других, более деликатных техник эффективнее, причиняет меньший стресс, обеспечивает безопасность персоналу клиники и позволяет кошке чувствовать, что она контролирует ситуацию. В случаях, когда речь идет о благополучии животного или безопасности сотрудников клиники, эти специалисты предпочитают применять другие методы.

Другие ветеринарные врачи бережно обращаются с кошками и берут их за холку только при необходимости, когда речь идет о здоровье пациента или безопасности персонала. Третьи считают, что это подходит для краткосрочных процедур, экстренных случаев или ситуаций, когда животное может убежать или поранить кого-нибудь.

- Полотенца и намордники, закрывающие глаза, успокаивают кошку за счет уменьшения количества визуальных стимулов, но не обездвиживают ее.
- Перчатки позволяют защитить руки. Некоторые эксперты не используют их, потому что в перчатках они не ощущают движения животного так, как при использовании полотенец. К тому же на них остаются посторонние запахи, которые могут привести кошку в возбужденное состояние<sup>53</sup>.
- Сети следует использовать очень редко, например, когда нужно достать кошку из клетки, чтобы дать ей успокоительное, или если животное убежало. Удостоверьтесь, что ячейки сети имеют подходящую для ловли небольших млекопитающих форму и размер (меньше, чем для ловли рыбы, чтобы пальцы кошки не могли в них застрять). Не используйте сети для обездвиживания животного, кроме случаев, когда

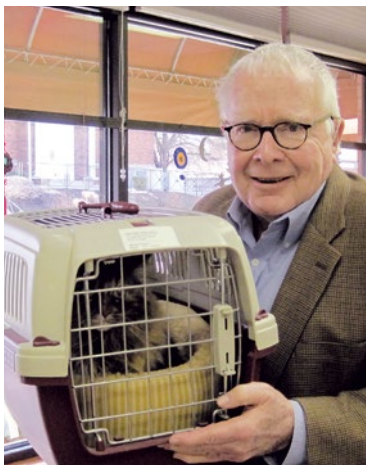

◀ **Рисунок 8.**  
Эту кошку принесли на прием со своей подстилкой.  
*Фото Eliza Sundahl.*

Если вы считаете, что взять кошку за холку — это единственный возможный вариант в данной ситуации, внимательно следите за любыми проявлениями страха или тревоги. Вы можете обездвигнуть животное, но оно не будет чувствовать себя комфортно, возможно возникновение агрессивного поведения. Держите кошку как можно деликатнее, избегайте грубых и жестких методов. Эксперты не приветствуют подъем животного за холку и удержание на весу в таком положении — это бессмысленно и может быть болезненно.

Еще одна методика — коррекция поведения с помощью зажимов. Они крепятся на кожу вдоль позвоночника<sup>44</sup>. Некоторые ветеринарные врачи и зоопсихологи не используют и не одобряют эту технику. Другие относятся к ней осторожно и опасаются, что контролировать поведение животного таким образом неэтично. Третьи думают, что метод зажимов можно применять во время проведения манипуляций некоторых кошек и только в строго определенных ситуациях, чтобы избежать захвата за холку (см выше). Кроме этого, вся процедура должна выполняться максимально точно и аккуратно<sup>48-50</sup>.

Примечание: эксперты ISFM/FAB решительно не поддерживают использование захвата за холку в качестве метода фиксации, если только он не является единственно возможным способом.

процедура длится всего несколько секунд (например, инъекция). Некоторые эксперты вообще не рекомендуют использовать этот тип средств фиксации.

- Специальные сумки для фиксации кошек дают доступ к подкожной головной вене и к лопаточно-плечевой части — это позволяет делать подкожные и внутривенные инъекции. Будьте готовы к тому, что поместить животное в сумку бывает сложно. Слишком тесная сумка может вызвать у кошки панику, слишком просторная не обеспечит нужную степень фиксации. Порой, обернув животное полотенцем, можно добиться лучших результатов.

## ВОЗВРАЩЕНИЕ ДОМОЙ

После визита к ветеринарному врачу кошка приносит с собой в дом посторонние материалы (например, повязки) и запахи (продукты распада ингаляционных анестетиков могут удаляться из организма и создавать запахи от 24 до 48 часов). Другие животные в доме могут принять ее за чужака и даже напасть. Чтобы уменьшить эти последствия, расспросите клиента, были ли подобные проблемы в прошлом, после каких ветеринарных процедур это происходило.

### Общие советы, как уменьшить агрессию со стороны других кошек

- Попросите клиента взять с собой в клинику что-нибудь, имеющее знакомый домашний запах (**Рисунок 8**).
- Посоветуйте обработать переноску синтетическими кошачьими феромонами лицевых желез, а также использовать их дома.

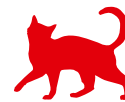

- Рекомендуйте клиенту по возвращении домой вести себя пассивно (не побуждать животных к взаимодействию, не кормить всех вместе).

### Если случаев агрессии в прошлом не было

Если раньше кошки не вели себя агрессивно после визитов к ветеринарному врачу, попробуйте следующее:

- Оставьте животное, которое побывало в клинике, в переноске, посмотрите, как реагирует другая кошка (кошки). Если они не шипят друг на друга и не показывают признаков страха или агрессии, оставьте их вместе приблизительно на 5–10 минут, не забывая присматривать за ними (кошка, вернувшаяся из клиники, должна по-прежнему сидеть в переноске).
- После оставьте животных уже без переноски в этой же комнате и следите за их поведением. При появлении признаков агрессии отвлеките животных друг от друга и разделите их. Постарайтесь не вставать между ними и не брать их на руки в таком возбужденном состоянии, иначе кошки могут направить свою агрессию на вас.

### Если высока вероятность агрессивного поведения

Если случаи агрессии после визитов в клинику уже были или описанные выше способы не дают положительного эффекта, посоветуйте клиенту следующее:

- Поместить кошку-пациента в отдельную комнату со всем необходимым минимум на 24 часа. Дождаться, когда все животные в доме снова начнут есть и играть, как обычно.
- Если после постепенного «возвращения» проблемы продолжают в течение трех дней, обратиться к ветеринарному врачу. Он даст советы, как еще можно «заново познакомить» кошек, или предложит препараты для упрощения процесса.

Часто в таких случаях бывает полезно брать с собой в клинику обоих животных. Возвращаясь домой, они приносят одни и те же запахи<sup>57</sup>.

## Выводы

- Повышение качества ветеринарного обслуживания кошек положительно повлияет на их здоровье и благополучие.
- Необходимо создавать комфортные условия для клиентов в ветеринарных клиниках, чтобы они приходили на прием.
- Изучение ветеринарными специалистами особенностей поведения кошек поможет улучшить обращение с кошками и повлияет на регулярность визитов в клинику.
- Относительно простые и небольшие меры, принятые на каждом этапе приема у ветеринарного врача, могут снизить уровень стресса и дать более позитивные эмоции всем участникам процесса.

### ПОЛЕЗНЫЕ РЕСУРСЫ ДЛЯ ВЕТЕРИНАРНЫХ СПЕЦИАЛИСТОВ И/ИЛИ КЛИЕНТОВ

Интернет-ресурсы. См. **Таблицу 1**.

## ПРЕПАРАТЫ ДЛЯ ОГРАНИЧЕНИЯ ПОДВИЖНОСТИ

Применение таких препаратов дает чувство безопасности и позволяет снизить уровень стресса не только у пациента, но и у его владельца и сотрудников клиники. Рекомендуется превентивное использование препаратов, ведь если животное уже возбуждено, препарат окажет менее эффективное и надежное воздействие. Показания к применению перечислены ниже.

Лучше всего использовать препараты, которые вводятся под кожу или внутримышечно, — это требует минимальных усилий по фиксации животного. По возможности применяйте вещества обратного действия. Если нет противопоказаний, можно применять следующую схему<sup>54</sup>:

- Дексметомидин в малых дозах и опиоид для снотворного эффекта. Последний препарат выбирайте в зависимости от требуемого уровня седации и обезболивания. Мю-опиоидные агонисты (например, морфин и гидроморфон) обладают обратимым действием. Буторфанол действует недолго и может подходить для некоторых процедур.
- Добавьте бензодиазепин (мидазолам) — он оказывает гипнотическое и снотворное воздействие, расслабляет мускулатуру, возможен амнезийный эффект (также обратимый)<sup>55</sup>.
- Если смесь опиоида, дексметомидина и мидазолама оказала недостаточный успокаивающий эффект, используйте небольшую дозу кетамина.

Если успокоительных средств недостаточно, чтобы провести медицинскую процедуру, применяйте общий наркоз. Имейте в виду, что использование специального помещения с анестетиком, распыленным в воздухе, позволяет удержать животное на месте, но вы не сможете в полной мере контролировать состояние дыхательных путей пациента. Кроме этого, работа в таких условиях может представлять опасность и для кошки, и для персонала<sup>56</sup>.

Каждый ветеринарный врач выбирает свой метод медикаментозной седации животного. Это зависит от симптомов и физического состояния пациента. Доступность средств в разных странах может отличаться. Если необходимо, проконсультируйтесь с анестезиологом. Специальные протоколы применения препаратов можно найти в различных источниках<sup>54</sup>. Интернет-сайты Общества ветеринарной анестезии и анальгезии и Американской коллегии ветеринарных анестезиологов содержат больше сведений (**см. Таблицу 1**).

### Показания к применению препаратов для ограничения подвижности

- Кошка демонстрирует признаки страха, тревоги или агрессии, и без применения специальных средств процедура займет больше времени.
- Болезненные процедуры, вызывающие чувство дискомфорта, а также ситуации с возможным хирургическим вмешательством, когда обычного обезболивания недостаточно.
- Деликатные способы фиксации и специальное оборудование не гарантируют достаточный уровень безопасности для персонала.

**ТАБЛИЦА 1. Полезные интернет-ресурсы для ветеринарных специалистов и/или клиентов**

| Информационный ресурс                                                                                                                                                                                                                                                                                                                                                    | Ссылка                                                                                        |
|--------------------------------------------------------------------------------------------------------------------------------------------------------------------------------------------------------------------------------------------------------------------------------------------------------------------------------------------------------------------------|-----------------------------------------------------------------------------------------------|
| <b>Американская ассоциация практикующих специалистов по лечению кошек (AAFP)</b> <ul style="list-style-type: none"> <li>Раздел для клиентов со ссылками на медицинскую информацию и способы обращения с животными.</li> <li>Ветеринарные руководства (забота о взрослых животных, возрастные периоды, вакцинация, уменьшение уровня болезненности процедур).</li> </ul>  | www.catvets.com                                                                               |
| <b>Американская коллегия ветеринарных анестезиологов</b> <ul style="list-style-type: none"> <li>Список анестезиологов-консультантов.</li> </ul>                                                                                                                                                                                                                          | www.acva.org                                                                                  |
| <b>Catalyst Council</b> <ul style="list-style-type: none"> <li>Видеоролики о том, как доставить кошку в ветеринарную клинику, приучить ее к переноске.</li> <li>Информация по уходу и заботе о здоровье.</li> </ul>                                                                                                                                                      | www.catalystcouncil.org<br>www.catalystcouncil.org/resources/video                            |
| <b>Ветеринарный факультет Корнеллского университета</b> <ul style="list-style-type: none"> <li>В видеоматериалах Корнеллского центра заботы о здоровье кошек показано, как научить животных переносить такие процедуры, как чистка зубов, прием лекарств, стрижка когтей, измерение температуры. Эти техники могут также быть использованы в других областях.</li> </ul> | http://partnersah.vet.cornell.edu/pet/cats                                                    |
| <b>Feline Advisory Bureau (FAB)</b> <ul style="list-style-type: none"> <li>Информация для владельцев кошек и заводчиков о заболеваниях животных, особенностях поведения и необходимых условиях для роста и развития.</li> <li>Полезные сведения о том, как давать таблетки и жидкие препараты.</li> </ul>                                                                | www.fabcats.org<br>www.fabcats.org > advice > owners > general cat care > medicating your cat |
| <b>Международное общество медицины кошек (ISFM)</b> <ul style="list-style-type: none"> <li>Ветеринарная информация, ранее размещенная на сайте FAB, плюс раздел «Комфортное лечение для кошек».</li> </ul>                                                                                                                                                               | www.isfm.net                                                                                  |
| <b>Проект по заботе о домашних питомцах Университета штата Огайо</b> <ul style="list-style-type: none"> <li>Доступная информация для ветеринарных специалистов и владельцев животных о поведении и потребностях кошек, способы создания условий жизни, которые не вызовут стресса и, как следствие, проблем со здоровьем.</li> </ul>                                     | http://indoorpet.osu.edu/cats                                                                 |
| <b>Общество ветеринарной анестезии и анальгезии</b> <ul style="list-style-type: none"> <li>Информация о специфических препаратах.</li> <li>Протоколы и схемы лечения.</li> </ul>                                                                                                                                                                                         | www.vasg.org<br>www.vasg.org/information_by_drug.htm<br>www.vasg.org/protocols.htm            |

## ЛИТЕРАТУРА

- Flanigan J, Shepherd A, Majchrzak S, Kirkpatrick D, San Filippo M. US pet ownership & demographics sourcebook. Schaumburg, IL: American Veterinary Medical Association, 2007: 1–3.
- Hoyumpa A, Rodan I, Brown M, et al. AAFP-AAHA Feline Life Stage Guidelines. J Feline Med Surg 2010; 12: 43–54.
- Greco DS. The effect of stress on the evaluation of feline patients. In: August JR, ed. Feline internal medicine. Philadelphia: WB Saunders, 1991: 13–17.
- Carlstead K, Brown JL, Strawn W. Behavioral and physiological correlates of stress in laboratory cats. Appl Anim Behav Sci 1993; 38: 143–58.
- Kaname H, Mori Y, Sumida Y, et al. Changes in the leukocyte distribution and surface expression of adhesion molecules induced by hypothalamic stimulation in the cat. Brain Behav Immun 2002; 16:351–67.
- Jeyaretnam J, Jones H, Phillip M. Disease and injury among veterinarians. Aust Vet J 2000; 78: 625–29.
- Overall KL. Normal feline behavior: clinical behavioral medicine for small animals. St Louis: Mosby, 1997: 45.
- Griffin B, Hume KR. Recognition and management of stress in housed cats. In: August J (ed). Consultations in feline internal medicine. 5th edn. St Louis: Saunders Elsevier, 2006: 717–33.
- Bowen J, Heath S. An overview of feline social behaviour and communication: behaviour problems in small animals: practice advice for the veterinary team. Philadelphia: Saunders, 2005: 29, 31, 164.
- Karsh EB. The effects of early and late handling on the attachment of cats to people. In: Anderson RK, Hart BL, Hart LA (eds). The pet connection. St Paul: Globe Press, 1983: 207–15.
- Crowell-Davis S, Curtis T, Knowles R. Social organization in the cat: a modern understanding. J Feline Med Surg 2004; 6: 19.
- Macdonald DW, Yamaguchi N, Kerby G. Group-living in the domestic cat: its sociobiology and epidemiology. In Turner DC, Bateson P (eds). The domestic cat: the biology of its behaviour. Cambridge: Cambridge University Press, 2000: 14, 95.
- Overall K, Panaman R. Behaviour and ecology of free-ranging female farm cats (*Felis catus* L.). Z Tierpsychol 1981; 56: 59–73.
- Griffin B, Hume KR. Recognition and management of stress in housed cats. In August J (ed). Consultations in feline internal medicine. 5th edn. St Louis: Saunders Elsevier, 2006: 717–33.
- Passanisi NC, Macdonald DW. Group discrimination on the basis of urine in a farm cat colony. In: Macdonald DW, Müller-Schwarze D, Natynczuk SE (eds). Chemical signals in vertebrates. Oxford: Oxford University Press, 1990: 339–41.
- MacDonald DW. The carnivores: order Carnivora. In: Brown RE, MacDonald DW (eds). Social odours in mammals. Oxford: Clarendon Press, 1985: 619–722.
- Bradshaw JWS, Hall SL. Affiliative behaviour of related and unrelated pairs of cats in catteries: a preliminary report. Appl Anim Behav Sci 1999; 63: 251–55.
- Soennichsen S, Chamove AS. Responses of cats to petting by humans. Anthrozoos 2002; 15: 258–65.
- Notari L. Stress in veterinary behavioural medicine. In Horwitz D, Mills D (eds). BSAVA manual of canine and feline behavioural medicine. 2nd edn. Gloucester: British Small Animal Veterinary Association, 2009: 136.
- Panksepp J. Affective consciousness: core emotional feelings in animals and humans. Conscious Cogn 2005; 14: 30–80.
- Heath S. Feline aggression. In: BSAVA manual of canine and feline behavioural medicine. Gloucester: British Small Animal Veterinary Association, 2002: 216.
- Hellyer P, Rodan I, Brunt J, Downing R, Hagedorn JE, Robertson SA. AAHA/AAFP pain management guidelines for dogs and cats. J Feline Med Surg 2007; 9: 466–80. Available at www.aahanet.org and www.catvets.com.
- AVSAB. AVSAB punishment position statement: The use of punishment for behavior modification in animals. American Veterinary Society of Animal Behavior, 2007. Available at www.avsabonline.org.



24. Rose C, Rodan R, Levy J, Dinnage JD. AAFP position statement: Transport of cats. *J Feline Med Surg* 2010; 12: 886–87. Available at [www.catvets.com](http://www.catvets.com).
25. Berton F, Vogel E, Belzung C. Modulation of mice anxiety in response to cat odor as a consequence of predators diet. *Physiol Behav* 1998; 65: 247–54.
26. Belew AM, Bartlett T, Brown SA. Evaluation of white-coat effect in cats. *J Vet Intern Med* 1999; 13: 134–42.
27. Crowell-Davis SL. White coat syndrome: prevention and treatment. *Compend Contin Educ Pract Vet* 2007; 29: 163–65.
28. Apfelbach R, Blanchard CD, Blanchard RJ, Hayes RA, McGregor IS. The effects of predator odors in mammalian prey species: a review of field and laboratory studies. *Neurosci Biobehav Rev* 2005; 29: 1123–44.
29. Gunn-Moore, DA, Cameron ME. A pilot study using synthetic feline facial pheromone for the management of feline idiopathic cystitis. *J Feline Med Surg* 2004; 6: 133–138.
30. Griffith C, Steigerwald E, Buffington C. Effects of a synthetic facial pheromone on behavior of cats. *J Am Vet Med Assoc* 2000; 217: 1154, 2000.
31. Kronen PW, Ludders JW, Hollis NE, et al. A synthetic fraction of feline facial pheromones calms but does not reduce struggling in cats before venous catheterization. *Vet Anaesth Analg* 2006; 33: 258–265.
32. Frank D, Beauchamp G, Palestini C. Systematic review of the use of pheromones for treatment of undesirable behavior in cats and dogs. *J Am Vet Med Assoc* 2010; 236: 1308–16.
33. Veranic P, Jezernik K. Succession of events in desquamation of superficial urothelial cells as a response to stress induced by prolonged constant illumination. *Tissue Cell* 2001; 33: 280–85.
34. Dalke H, Little J, Niemann E, et al. Colour and lighting in hospital design. *Optics & Laser Technology* 2006; 38: 343–65.
35. Zhao YP, Wang XY, Wang ZC, et al. Essential oil of *Actinidia macrocarpa*, a catnip response kiwi endemic to China. *J Zhejiang Univ Sci B*. 2006; 7: 708–12.
36. Todd NB. Inheritance of the catnip response in domestic cats. *Hered* 1962; 53: 54–56.
37. Stella JL, Lord LK, Buffington CA. Sickness behaviors in response to unusual external events in healthy cats and cats with feline interstitial cystitis *J Am Vet Med Assoc* 2010; 238: 67–73.
38. Robertson S, Lascelles D. Long-term pain in cats: how much do we know about this important welfare issue? *J Feline Med Surg* 2010; 12: 188–199.
39. Brown S, Atkins C, Bagley R, et al. Guidelines for the identification, evaluation, and management of systemic hypertension in dogs and cats. *J Vet Intern Med* 2007; 21: 542–58.
40. Holzworth J. Cat diseases. Philadelphia: WB Saunders, 1987: 5.
41. Bennett AD, MacPhail CM, Gibbons DS, Lappin MR. A comparative study evaluating the esophageal transit time of eight

- healthy cats when pilled with the FlavoRx pill glide versus pill delivery treats. *J Feline Med Surg* 2010; 12: 286–90.
42. Richards JR, Elston TH, Ford RB, et al. The 2006 American Association of Feline Practitioners Feline Vaccine Advisory Panel report. *J Am Vet Med Assoc* 2006; 229: 1405–41.
43. Houpt KA. Domestic animal behavior. 4th edn. Ames, Iowa: Blackwell Publishing, 2005: 177, 240–41.
44. Pozza ME, Stella JL, Chappuis-Gagnon AC, Wagner SO, Buffington CA. Pinch-induced behavioral inhibition ('clipnosis') in domestic cats. *J Feline Med Surg* 2008; 10: 82–87.
45. Baerends-van Roon JM, Baerends GP. The morphogenesis of the behaviour of the domestic cat: with a special emphasis on the development of prey-catching. Amsterdam, North Holland Publishing, 1979: 12.
46. Beaver BV. Feline behavior: a guide for veterinarians. St Louis: Saunders Elsevier, 2003.
47. Bradshaw J. Behaviour of cats. In: Jensen P (ed). *Ethology of domestic animals*. 2nd edn. Oxford, UK: CABI International, 2009:212.
48. Tarttelin M. Restraint in the cat induced by skin clips. *J Neurosci* 1991; 57: 288.
49. Lefebvre L, Sabourin M. Response differences in animal hypnosis: a hypothesis. *Psychol Rec* 1977; 1: 77–87.
50. Klemm WR. Identity of sensory and motor systems that are critical to the immobility reflex (animal hypnosis). *Psychol Rec* 1977; 1:145–59.
51. Hickman MA, Cox SR, Mahabir S, et al. Safety, pharmacokinetics and use of the novel NK-1 receptor antagonist maropitant (Cerenia™) for the prevention of emesis and motion sickness. *J Vet Pharmacol Ther* 2008; 31: 220–29.
52. Kronen PW, Ludders JW, Erb HN, Moon PF, Gleed RD, Koski S. A synthetic fraction of feline facial pheromones calms but does not reduce struggling in cats before venous catheterization. *Vet Anaesth Analg* 2006; 33: 258–65.
53. Takahashi LK, Nakashima BR, Hong HC, et al. The smell of danger: a behavioral and neural analysis of predator odor-induced fear. *Neurosci Biobehav Rev* 2005; 29: 1157–67.
54. Moffat K. Addressing canine and feline aggression in the veterinary clinic. *Vet Clin North Am Small Anim Pract* 2008; 38: 983–1003.
55. Ebner J, Wehr U, Baumgartner C, Erhardt W, Henke J. Partial antagonization of midazolam-medetomidine-ketamine in cats — atipamezole versus combined atipamezole and flumazenil. *J Vet Med A Physiol Pathol Clin Med* 2007; 54: 518–21.
56. US Department of Labor: OSHA. Anesthetic gases: guidelines for workplace exposures. Revised May 18, 2000: <http://www.osha.gov/dts/osta/anestheticgases>.
57. Arakawa H, Arakawa K, Deak T. Sickness-related odor communication signals as determinants of social behavior in rat: a role for inflammatory processes. *Horm Behav* 2010; 57: 330–41.

## ПОЛЕЗНАЯ ЛИТЕРАТУРА

Некоторые из этих книг доступны в электронном формате, за дополнительной информацией обращайтесь к издателю или литературному агенту.

- Beaver B. Feline behavior: guide for veterinarians. Saunders, 2003.
- Bowen J, Heath S. Behavior problems in small animals. Elsevier Saunders, 2005.
- Bohnenkamp G. From the cat's point of view. Perfect Paws Publishing, 1991.
- Heath S. Why is my cat doing that? Hamlyn/Thunder Bay Press, 2009.
- Horwitz D, Landsberg G. (Edited for UK by Heath, Mills and Zulch, and for Australia by Seksel). Lifelearn behavior client handouts. [www.lifelearn-cliented.com](http://www.lifelearn-cliented.com).

## МАТЕРИАЛЫ ДЛЯ КЛИЕНТОВ

Материалы для клиентов — дополнение к этому руководству. Они доступны на сайтах [www.catvets.com](http://www.catvets.com) и [www.isfm.net](http://www.isfm.net). Там описаны способы, которые можно использовать дома,

- Horwitz D, Mills D (eds). BSAVA manual of canine and feline behavioral medicine. 2nd edn. British Small Animal Veterinary Association, 2009.
- Horwitz D, Neilson J. Blackwell's five-minute veterinary consult. Clinical companion: canine and feline behavior. Blackwell Publishing, 2007.
- Landsberg G, Hunthausen H, Ackerman L. Handbook of behavior problems of the dog and cat. 2nd edn. Elsevier, 2003.
- Moffat K. Addressing canine and feline aggression in the veterinary clinic. *Vet Clin North Am Small Anim Pract* 2008; 8: 983–1003.
- Seksel K. Training your cat. Hyland House Publications, 2001.
- Yin S. Low stress handling, restraint and behavior modification of dogs & cats (book and DVD). CattleDog Publishing, 2009.

чтобы облегчить последующий визит в клинику, в том числе способы приучения кошек к переноске и различным процедурам.
